# Supplementary material for: Suicide rates among physicians compared with the general population in studies from 20 countries: gender stratified systematic review and meta-analysis
Source: PubMed Central journal article supplement — BMJ. 2024 Aug 21;386:e078964. doi: 10.1136/bmj-2023-078964 (PMC11337323; doi:10.1136/bmj-2023-078964), 2024-08-21
Supplement: zimc078964.ww.pdf [file zimc078964.ww.pdf]

## SUPPLEMENT

### Suicide rates among physicians compared with the general population in studies from 20 countries: gender stratified systematic review and meta-analysis

**Table S1: Example for database search strategy (PsycInfo)**

|    |                                                                                                                                                                                                                                                                                                                                                                                                                                                                                                                                                                                                                                                                                                                                                                                                                                                 |
|----|-------------------------------------------------------------------------------------------------------------------------------------------------------------------------------------------------------------------------------------------------------------------------------------------------------------------------------------------------------------------------------------------------------------------------------------------------------------------------------------------------------------------------------------------------------------------------------------------------------------------------------------------------------------------------------------------------------------------------------------------------------------------------------------------------------------------------------------------------|
| 1  | suicide/                                                                                                                                                                                                                                                                                                                                                                                                                                                                                                                                                                                                                                                                                                                                                                                                                                        |
| 2  | suicide*.ti,ab,id,tm,tc.                                                                                                                                                                                                                                                                                                                                                                                                                                                                                                                                                                                                                                                                                                                                                                                                                        |
| 3  | ((smr or smrs) and mortal*).ti,ab,id,tm,tc.                                                                                                                                                                                                                                                                                                                                                                                                                                                                                                                                                                                                                                                                                                                                                                                                     |
| 4  | (standard* adj2 mortal* adj2 (rate* or ratio*)).ti,ab,id,tm,tc.                                                                                                                                                                                                                                                                                                                                                                                                                                                                                                                                                                                                                                                                                                                                                                                 |
| 5  | 1 or 2 or 3 or 4                                                                                                                                                                                                                                                                                                                                                                                                                                                                                                                                                                                                                                                                                                                                                                                                                                |
| 6  | exp physicians/                                                                                                                                                                                                                                                                                                                                                                                                                                                                                                                                                                                                                                                                                                                                                                                                                                 |
| 7  | (physician* or doctor* or medical practitioner* or general practitioner* or gp or gps or consultant*).ti,id,tc.                                                                                                                                                                                                                                                                                                                                                                                                                                                                                                                                                                                                                                                                                                                                 |
| 8  | (allergist* or anesthetist* or anaesthetist* or anesthesiologist* or anaesthesiologist* or cardiologist* or dermatologist* or dentist* or endocrinologist* or gastroenterologist* or geriatrician* or gynecologist* or gynaecologist* or obstetrician* or urogynecologist* or urogynaecologist* or nephrologist* or hospitalist* or neurologist* or neurosurgeon* or oncologist* or ophthalmologist* or otolaryngologist* or otorhinolaryngologist* or pathologist* or pediatrician* or paediatrician* or neonatologist* or orthopedist* or physiatrist* or psychiatrist* or pulmonologist* or radiologist* or rheumatologist* or surgeon* or urologist* or medical profession* or health professional*).ti,id,tc.                                                                                                                              |
| 9  | 6 or 7 or 8                                                                                                                                                                                                                                                                                                                                                                                                                                                                                                                                                                                                                                                                                                                                                                                                                                     |
| 10 | 5 and 9                                                                                                                                                                                                                                                                                                                                                                                                                                                                                                                                                                                                                                                                                                                                                                                                                                         |
| 11 | "Death and Dying"/                                                                                                                                                                                                                                                                                                                                                                                                                                                                                                                                                                                                                                                                                                                                                                                                                              |
| 12 | mortality rate/                                                                                                                                                                                                                                                                                                                                                                                                                                                                                                                                                                                                                                                                                                                                                                                                                                 |
| 13 | 11 or 12                                                                                                                                                                                                                                                                                                                                                                                                                                                                                                                                                                                                                                                                                                                                                                                                                                        |
| 14 | exp *physicians/                                                                                                                                                                                                                                                                                                                                                                                                                                                                                                                                                                                                                                                                                                                                                                                                                                |
| 15 | 13 and 14                                                                                                                                                                                                                                                                                                                                                                                                                                                                                                                                                                                                                                                                                                                                                                                                                                       |
| 16 | ((physician* or doctor* or medical practitioner* or general practitioner* or gp or gps or consultant*) and mortal*).ti,id,tc.                                                                                                                                                                                                                                                                                                                                                                                                                                                                                                                                                                                                                                                                                                                   |
| 17 | ((allergist* or anesthetist* or anaesthetist* or anesthesiologist* or anaesthesiologist* or cardiologist* or dermatologist* or dentist* or endocrinologist* or gastroenterologist* or geriatrician* or gynecologist* or gynaecologist* or obstetrician* or urogynecologist* or urogynaecologist* or nephrologist* or hospitalist* or neurologist* or neurosurgeon* or oncologist* or ophthalmologist* or otolaryngologist* or otorhinolaryngologist* or pathologist* or pediatrician* or paediatrician* or neonatologist* or orthopedist* or physiatrist* or psychiatrist* or pulmonologist* or radiologist* or rheumatologist* or surgeon* or urologist* or medical profession* or health professional*) and mortal*).ti,id,tc.                                                                                                                |
| 18 | ((suicid* adj2 (rate* or ratio* or tendenc* or statistic* or incidenc* or prevalen* or praevalen* or study or studies)) and (physician* or doctor* or medical practitioner* or general practitioner* or gp or gps or consultant*)).ti,id,tc.                                                                                                                                                                                                                                                                                                                                                                                                                                                                                                                                                                                                    |
| 19 | ((suicid* adj2 (rate* or ratio* or tendenc* or statistic* or incidenc* or prevalen* or praevalen* or study or studies)) and (allergist* or anesthetist* or anaesthetist* or anesthesiologist* or anaesthesiologist* or cardiologist* or dermatologist* or dentist* or endocrinologist* or gastroenterologist* or geriatrician* or gynecologist* or gynaecologist* or obstetrician* or urogynecologist* or urogynaecologist* or nephrologist* or hospitalist* or neurologist* or neurosurgeon* or oncologist* or ophthalmologist* or otolaryngologist* or otorhinolaryngologist* or pathologist* or pediatrician* or paediatrician* or neonatologist* or orthopedist* or physiatrist* or psychiatrist* or pulmonologist* or radiologist* or rheumatologist* or surgeon* or urologist* or medical profession* or health professional*)).ti,id,tc. |
| 20 | (cause* of death* and (physician* or doctor* or medical practitioner* or general practitioner* or gp or gps or consultant*)).ti,id,tc.                                                                                                                                                                                                                                                                                                                                                                                                                                                                                                                                                                                                                                                                                                          |
| 21 | (cause* of death* and (allergist* or anesthetist* or anaesthetist* or anesthesiologist* or anaesthesiologist* or cardiologist* or dermatologist* or dentist* or endocrinologist* or gastroenterologist* or geriatrician* or gynecologist* or gynaecologist* or obstetrician* or urogynecologist* or urogynaecologist* or nephrologist* or hospitalist* or neurologist* or neurosurgeon* or oncologist* or ophthalmologist* or otolaryngologist* or otorhinolaryngologist* or pathologist* or pediatrician* or paediatrician* or neonatologist* or orthopedist* or physiatrist* or psychiatrist* or pulmonologist* or radiologist* or rheumatologist* or surgeon* or urologist* or medical profession* or health professional*)).ti,id,tc.                                                                                                       |

|    |                                                                                                                                                                               |
|----|-------------------------------------------------------------------------------------------------------------------------------------------------------------------------------|
| 22 | 10 or 15 or 16 or 17 or 18 or 19 or 20 or 21                                                                                                                                  |
| 23 | assisted suicide/                                                                                                                                                             |
| 24 | ((suicide* or death* or dying) adj1 assist*).ti,id.                                                                                                                           |
| 25 | (aid adj2 dying).ti,id.                                                                                                                                                       |
| 26 | euthanasia/                                                                                                                                                                   |
| 27 | euthanasia.ti,id.                                                                                                                                                             |
| 28 | 23 or 24 or 25 or 26 or 27                                                                                                                                                    |
| 29 | (non assist* suicide* or nonassist* suicide* or nonassist* death* or non assist* death* or nonassist* dying or non assist* dying or total suicide* or total deaths).ti,ab,id. |
| 30 | 28 not 29                                                                                                                                                                     |
| 31 | 22 not 30                                                                                                                                                                     |
| 32 | limit 31 to up=19600101-20231011                                                                                                                                              |

**Table S2: List of studies excluded at full-text screening stage**

|    | <b>Study</b>                                                                                  | <b>Reason for exclusion</b> | <b>Comments</b>                                                                                                      |
|----|-----------------------------------------------------------------------------------------------|-----------------------------|----------------------------------------------------------------------------------------------------------------------|
| 1  | Alexander et al. (2000) <sup>1</sup>                                                          | Physician subgroup          | Anesthesiologists                                                                                                    |
| 2  | Andersen et al. (2001) <sup>2</sup>                                                           | Physician subgroup          | Physicians employed in hospitals                                                                                     |
| 3  | Andersen et al. (2009) <sup>3</sup>                                                           | Physician subgroup          | Physicians employed in hospitals                                                                                     |
| 4  | Arnetz et al. (1986) <sup>4</sup>                                                             | Physician subgroup          | Dentists                                                                                                             |
| 5  | Arnetz et al. (1987) <sup>5</sup>                                                             | Physician subgroup          | Dentists                                                                                                             |
| 6  | Bamayr & Feuerlein (1984) <sup>6</sup>                                                        | Same data                   | Same data as used in Bamayr & Feuerlein 1986                                                                         |
| 7  | Blachly (1963) <sup>7</sup>                                                                   | Overall estimate only       |                                                                                                                      |
| 8  | Blachly et al. (1968) <sup>8</sup> , additional information in Sakinofsky (1980) <sup>9</sup> | Overlap                     | Overlap with Craig & Pitts 1968, smaller sample size                                                                 |
| 9  | Bruce et al. (1968) <sup>10</sup>                                                             | Physician subgroup          | Anesthesiologists                                                                                                    |
| 10 | Borgan & Kristofersen (1986) <sup>11</sup>                                                    | Same data                   | Same data (shorter time period) as Aasland et al. 2011                                                               |
| 11 | Burnett et al. (1997) <sup>12</sup>                                                           | PMR                         |                                                                                                                      |
| 12 | Carpenter et al. (1997) <sup>13</sup>                                                         | Overlap                     | Overlap with ONS England & Wales (1970-72), ONS Great Britain (1979-82), and Hawton et al. 2001, smaller sample size |
| 13 | De Hart (1974) <sup>14</sup> , additional information in Sakinofsky (1980) <sup>9</sup>       | Overlap                     | Overlap with Craig & Pitts 1968, Rich & Pitts 1979, smaller sample size                                              |
| 14 | Doll & Peto (1977) <sup>15</sup>                                                              | Physician subgroup          | Psychiatrists                                                                                                        |
| 15 | Duarte et al. (2022) <sup>16</sup>                                                            | PMR                         |                                                                                                                      |
| 16 | Everson & Fraumeni (1975) <sup>17</sup>                                                       | Overall estimate only       |                                                                                                                      |
| 17 | France & Ugarte (1977) <sup>18</sup>                                                          | Overall estimate only       |                                                                                                                      |
| 18 | Frank et al. (2000) <sup>19</sup>                                                             | PMR                         |                                                                                                                      |
| 19 | Hall et al. (1991) <sup>20</sup>                                                              | Physician subgroup          | Pathologists                                                                                                         |
| 20 | Harrington & Oakes (1984) <sup>21</sup>                                                       | Physician subgroup          | Pathologists                                                                                                         |
| 21 | Harrington & Shannon (1975) <sup>22</sup>                                                     | Physician subgroup          | Pathologists                                                                                                         |

|    |                                                                      |                          |                                                                                                                                                                                                                                                                                                                                                                      |
|----|----------------------------------------------------------------------|--------------------------|----------------------------------------------------------------------------------------------------------------------------------------------------------------------------------------------------------------------------------------------------------------------------------------------------------------------------------------------------------------------|
| 22 | Hem et al. (2005) <sup>23</sup>                                      | Same data                | Same data as used in Aasland et al. 2011                                                                                                                                                                                                                                                                                                                             |
| 23 | Hill & Harvey (1972) <sup>24</sup>                                   | Physician subgroup       | Dentists                                                                                                                                                                                                                                                                                                                                                             |
| 24 | Juel et al. (1997) <sup>25</sup>                                     | Same data                | Same data as used in Juel et al. 1999                                                                                                                                                                                                                                                                                                                                |
| 25 | Kavaliauskas et al. (2023) <sup>26</sup>                             | Overall estimate only    |                                                                                                                                                                                                                                                                                                                                                                      |
| 26 | Kelly & Bunting (1998) <sup>27</sup>                                 | PMR                      |                                                                                                                                                                                                                                                                                                                                                                      |
| 27 | Kelly et al. (1995) <sup>28</sup>                                    | PMR                      |                                                                                                                                                                                                                                                                                                                                                                      |
| 28 | Kobo et al. (2023) <sup>29</sup>                                     | PMR                      |                                                                                                                                                                                                                                                                                                                                                                      |
| 29 | Kolves & De Leo (2013) <sup>30</sup>                                 | Overlap                  | Overlap with Petrie et al. 2023, smaller sample size                                                                                                                                                                                                                                                                                                                 |
| 30 | Lee (1979) <sup>31</sup>                                             | Same data                | Same data as used in ONS England & Wales (1949-53) and ONS England & Wales (1970-72)                                                                                                                                                                                                                                                                                 |
| 31 | Lee et al. (2020) <sup>32</sup>                                      | Physician subgroup       | Radiologists                                                                                                                                                                                                                                                                                                                                                         |
| 32 | Linde et al. (1981) <sup>33</sup>                                    | Physician subgroup       | Anesthesiologists                                                                                                                                                                                                                                                                                                                                                    |
| 33 | Lollis et al. (2010) <sup>34</sup>                                   | Physician subgroup       | Neurosurgeons                                                                                                                                                                                                                                                                                                                                                        |
| 34 | Milner et al. (2016) <sup>35</sup>                                   | Same data                | Same data (shorter time period) as Petrie et al. 2023                                                                                                                                                                                                                                                                                                                |
| 35 | Naumovska (2015) <sup>36</sup>                                       | Insufficient information | No values for O/E, unable to contact author                                                                                                                                                                                                                                                                                                                          |
| 36 | Neil et al. (1987) <sup>37</sup>                                     | Physician subgroup       | Anesthesiologists                                                                                                                                                                                                                                                                                                                                                    |
| 37 | Nordentoft (1988) <sup>38</sup> citing Andersen (1985) <sup>39</sup> | Overlap                  | Overlap with Juel et al. 1999, smaller sample size                                                                                                                                                                                                                                                                                                                   |
| 38 | Olfson et al. (2023) <sup>40</sup>                                   | Overlap                  | Overlap with Davis et al. 2021, Gold et al. 2021, and Ye et al. 2021, smaller sample size                                                                                                                                                                                                                                                                            |
| 39 | ONS England, 2001-2010 <sup>41</sup>                                 | Insufficient information | Found in Duarte et al. 2020, referenced website of the Office for National Statistics (ONS) UK did not reveal data source. ONS was contacted via email and replied, but was unable to provide necessary data for this calculation. First/corresponding and last authors of Duarte et al. (2020) were contacted via two email addresses each, but there was no reply. |
| 40 | ONS England & Wales, 1991-2000 <sup>42</sup>                         | PMR                      |                                                                                                                                                                                                                                                                                                                                                                      |
| 41 | OPCS England & Wales, 1970-1972 <sup>43</sup>                        | Physician subgroup       | Unmarried female physicians                                                                                                                                                                                                                                                                                                                                          |
| 42 | Roberts et al. (2013) <sup>44</sup>                                  | Same data                | Same data as OPCS (1986) and Meltzer et al. 2008                                                                                                                                                                                                                                                                                                                     |
| 43 | Rose & Rosow (1973) <sup>45</sup>                                    | Overlap                  | Overlap with Enstrom 1983, smaller sample size                                                                                                                                                                                                                                                                                                                       |
| 44 | Samkoff et al. (1995) <sup>46</sup>                                  | Overlap                  | Overlap with Petersen & Burnett 2008, smaller sample size                                                                                                                                                                                                                                                                                                            |
| 45 | Shang et al. (2011) <sup>47</sup>                                    | Overall estimate only    |                                                                                                                                                                                                                                                                                                                                                                      |
| 46 | Shang et al. (2012) <sup>48</sup>                                    | Physician subgroup       | Dentists                                                                                                                                                                                                                                                                                                                                                             |
| 47 | Shepherd et al. (2020) <sup>49</sup>                                 | PMR                      |                                                                                                                                                                                                                                                                                                                                                                      |
| 48 | Shimpo et al. (1998) <sup>50</sup>                                   | Physician subgroup       | Dentists                                                                                                                                                                                                                                                                                                                                                             |
| 49 | Simpson et al. (1983) <sup>51</sup>                                  | Physician subgroup       | Dentists                                                                                                                                                                                                                                                                                                                                                             |
| 50 | Sonneck & Wagner (1996) <sup>52</sup>                                | Insufficient information | No numbers of observed suicides, authors were contacted via email and replied, but                                                                                                                                                                                                                                                                                   |

|    |                                                 |                       |                                                                                            |
|----|-------------------------------------------------|-----------------------|--------------------------------------------------------------------------------------------|
|    |                                                 |                       | were unable to provide more information (due to retirement)                                |
| 51 | Sood et al. (2022) <sup>53</sup>                | Overall estimate only |                                                                                            |
| 52 | Steppacher & Mausner (1974) <sup>54</sup>       | Overlap               | Overlap with Craig & Pitts 1968, Rich & Pitts 1979, Pitts et al. 1979, smaller sample size |
| 53 | Torre et al. (2005) <sup>55</sup>               | Overlap               | Overlap with most US studies, smaller sample size                                          |
| 54 | Ullmann et al. (1991) <sup>56</sup>             | Overlap               | Overlap with most US studies, smaller sample size                                          |
| 55 | Windsor-Shelland & Gunnell (2019) <sup>57</sup> | Same data             | Same data (shorter time period) as calculation with ONS England data for 2011-2020         |
| 56 | Yaghmour et al. (2017) <sup>58</sup>            | Physician subgroup    | Residents                                                                                  |
| 57 | Yatsu (1979) <sup>59</sup>                      | Physician subgroup    | Dentists                                                                                   |
| 58 | Zaid & Diab (2021) <sup>60</sup>                | Overall estimate only |                                                                                            |

**Table S3a: Item overview for the JBI Checklist for Prevalence Studies<sup>61</sup>**

| <b>Nr.</b> | <b>Original question</b>                                                                        | <b>Decision on use for risk of bias assessment</b>                                                                                                                                                                                                                                              |
|------------|-------------------------------------------------------------------------------------------------|-------------------------------------------------------------------------------------------------------------------------------------------------------------------------------------------------------------------------------------------------------------------------------------------------|
| JBI 1      | 1. Was the sample frame appropriate to address the target population?                           | Item was used and answers specified (see Table S3b).                                                                                                                                                                                                                                            |
| JBI 2      | 2. Were study participants sampled in an appropriate way?                                       | Not applicable:<br>Sampling strategies are not a likely source of bias since the included registry-based or cohort studies are usually not based on samples.                                                                                                                                    |
| JBI 3      | 3. Was the sample size adequate?                                                                | Item was used and answers specified (see Table S3b).                                                                                                                                                                                                                                            |
| JBI 4      | 4. Were the study subjects and the setting described in detail?                                 | Item was used and answers specified (see Table S3b).                                                                                                                                                                                                                                            |
| JBI 5      | 5. Was the data analysis conducted with sufficient coverage of the identified sample?           | Not applicable:<br>Registry-based or cohort studies of mortality typically achieve high coverage (90-100%) for known cause of death in the observed physician population.                                                                                                                       |
| JBI 6      | 6. Were valid methods used for the identification of the condition?                             | Item was used and answers specified (see Table S3b).                                                                                                                                                                                                                                            |
| JBI 7      | 7. Was the condition measured in a standard, reliable way for all participants?                 | Item was used and answers specified (see Table S3b).                                                                                                                                                                                                                                            |
| JBI 8      | 8. Was there appropriate statistical analysis?                                                  | Item was used and answers specified (see Table S3b).                                                                                                                                                                                                                                            |
| JBI 9      | 9. Was the response rate adequate, and if not, was the low response rate managed appropriately? | Not applicable:<br>While important for prevalence studies using surveys, response rate is not a point of concern for bias in studies of mortality. As mentioned for JBI 5, these studies are typically characterized by high coverage for cause of death in the observed physician populations. |

**Table S3b: Adapted JBI Checklist for Prevalence Studies<sup>61</sup>**

| Point | Original question                                                                               | Specification                                                                                                                                                                                                                                                                                                             |
|-------|-------------------------------------------------------------------------------------------------|---------------------------------------------------------------------------------------------------------------------------------------------------------------------------------------------------------------------------------------------------------------------------------------------------------------------------|
| JBI 1 | 1. Was the sample frame appropriate to address the target population?                           | Yes: Data source for target population was an official registry with mandatory registration.                                                                                                                                                                                                                              |
|       |                                                                                                 | No: Data source was not an official registry or did not have mandatory registration.                                                                                                                                                                                                                                      |
|       |                                                                                                 | Unclear: Insufficient information on data source.                                                                                                                                                                                                                                                                         |
| JBI 2 | 2. Were study participants sampled in an appropriate way?                                       | Not applicable.                                                                                                                                                                                                                                                                                                           |
| JBI 3 | 3. Was the sample size adequate?                                                                | Yes: Sample size was large enough to detect the previously identified SMR of 1.41 for male and 2.27 for female physicians with a significance level of 5% and power of 80%. A sample size calculation for these parameters gave an expected number of suicides higher than 55.87 for male and 7.65 for female physicians. |
|       |                                                                                                 | No: Expected number of suicides lower than 55.87 for male and lower than 7.65 for female physicians.                                                                                                                                                                                                                      |
| JBI 4 | 4. Were the study subjects and the setting described in detail?                                 | Yes: Sufficient information on composition of target population (physicians only, physicians including dentists, single medical specialties).                                                                                                                                                                             |
|       |                                                                                                 | No: Insufficient information on target population.                                                                                                                                                                                                                                                                        |
| JBI 5 | 5. Was the data analysis conducted with sufficient coverage of the identified sample?           | Not applicable.                                                                                                                                                                                                                                                                                                           |
| JBI 6 | 6. Were valid methods used for the identification of the condition?                             | Yes: Appropriate method of suicide identification was used and ICD classification (or similar) was applied.                                                                                                                                                                                                               |
|       |                                                                                                 | No: No appropriate method for suicide identification used or no ICD classification (or similar) applied.                                                                                                                                                                                                                  |
|       |                                                                                                 | Unclear: Insufficient information to determine method of identification or classification.                                                                                                                                                                                                                                |
| JBI 7 | 7. Was the condition measured in a standard, reliable way for all participants?                 | Yes: Same approach to identify suicide as cause of death for all study subjects.                                                                                                                                                                                                                                          |
|       |                                                                                                 | No: Different methods used to identify suicide as cause of death for subgroups of study subjects.                                                                                                                                                                                                                         |
|       |                                                                                                 | Unclear: Insufficient information on identification of suicides.                                                                                                                                                                                                                                                          |
| JBI 8 | 8. Was there appropriate statistical analysis?                                                  | Yes: Appropriate age-standardisation for the reported outcome measure and measures of uncertainty were reported.                                                                                                                                                                                                          |
|       |                                                                                                 | No: No appropriate age-standardisation for the reported outcome measure or no measures of uncertainty were used.                                                                                                                                                                                                          |
|       |                                                                                                 | Unclear: Insufficient information on statistical analysis.                                                                                                                                                                                                                                                                |
| JBI 9 | 9. Was the response rate adequate, and if not, was the low response rate managed appropriately? | Not applicable.                                                                                                                                                                                                                                                                                                           |

**Table S4a: Risk of bias assessment based on the adapted JBI Checklist (studies on male physicians)\***

| Study                                         | JBI 1 | JBI 2 | JBI 3 | JBI 4 | JBI 5 | JBI 6 | JBI 7 | JBI 8 | JBI 9 | Bias risk     |
|-----------------------------------------------|-------|-------|-------|-------|-------|-------|-------|-------|-------|---------------|
| Lindhardt et al. (1963) <sup>62</sup>         | Y     | NA    | N     | N     | NA    | Y     | Y     | N     | NA    | moderate/high |
| Craig & Pitts (1968) <sup>63</sup>            | U     | NA    | Y     | N     | NA    | U     | N     | N     | NA    | moderate/high |
| Dean (1969) <sup>64</sup>                     | U     | NA    | N     | Y     | NA    | Y     | Y     | N     | NA    | moderate/high |
| Rich & Pitts (1979) <sup>65</sup>             | U     | NA    | Y     | N     | NA    | N     | N     | N     | NA    | moderate/high |
| Balogh (1981) <sup>66</sup>                   | Y     | NA    | N     | N     | NA    | U     | U     | N     | NA    | moderate/high |
| Enstrom (1983) <sup>67</sup>                  | U     | NA    | N     | Y     | NA    | Y     | Y     | N     | NA    | moderate/high |
| Revicki & May (1985) <sup>68</sup>            | Y     | NA    | N     | Y     | NA    | U     | Y     | N     | NA    | moderate/high |
| Bämayr & Feuerlein (1986) <sup>69</sup>       | Y     | NA    | N     | Y     | NA    | U     | N     | Y     | NA    | moderate/high |
| OPCS England & Wales A (1986) <sup>70</sup>   | Y     | NA    | N     | Y     | NA    | Y     | Y     | N     | NA    | moderate/high |
| OPCS England & Wales B (1986) <sup>70</sup>   | Y     | NA    | N     | Y     | NA    | Y     | Y     | N     | NA    | moderate/high |
| OPCS England & Wales C (1986) <sup>70</sup>   | Y     | NA    | N     | Y     | NA    | Y     | Y     | N     | NA    | moderate/high |
| OPCS Great Britain (1986) <sup>70</sup>       | Y     | NA    | N     | Y     | NA    | Y     | Y     | N     | NA    | moderate/high |
| Richings et al. (1986) <sup>71</sup>          | Y     | NA    | N     | Y     | NA    | Y     | Y     | Y     | NA    | moderate/high |
| Arnetz et al. (1987) <sup>72</sup>            | Y     | NA    | N     | Y     | NA    | Y     | Y     | Y     | NA    | moderate/high |
| Rimpelä et al. (1987) <sup>73</sup>           | Y     | NA    | N     | Y     | NA    | Y     | Y     | U     | NA    | moderate/high |
| Kono et al. (1988) <sup>74</sup>              | N     | NA    | N     | Y     | NA    | Y     | Y     | Y     | NA    | moderate/high |
| Schlicht et al. (1990) <sup>75</sup>          | U     | NA    | N     | N     | NA    | Y     | Y     | Y     | NA    | moderate/high |
| Stefansson & Wicks (1991) <sup>76</sup>       | Y     | NA    | N     | Y     | NA    | Y     | Y     | N     | NA    | moderate/high |
| Shima et al. (1992) <sup>77</sup>             | Y     | NA    | N     | Y     | NA    | Y     | Y     | Y     | NA    | moderate/high |
| Herner (1993) <sup>78</sup>                   | N     | NA    | N     | N     | NA    | N     | N     | N     | NA    | moderate/high |
| Lindeman et al. (1997) <sup>79</sup>          | Y     | NA    | N     | Y     | NA    | Y     | Y     | Y     | NA    | moderate/high |
| Rafnsson & Gunnarsdottir (1998) <sup>80</sup> | Y     | NA    | N     | N     | NA    | Y     | Y     | Y     | NA    | moderate/high |
| Juel et al. (1999) <sup>81</sup>              | Y     | NA    | Y     | Y     | NA    | Y     | Y     | Y     | NA    | low           |
| Hawton et al. (2001) <sup>82</sup>            | Y     | NA    | Y     | Y     | NA    | Y     | Y     | Y     | NA    | low           |
| Hostettler & Minder (2002) <sup>83</sup>      | U     | NA    | N     | Y     | NA    | U     | U     | Y     | NA    | moderate/high |
| Innos et al. (2002) <sup>84</sup>             | N     | NA    | N     | Y     | NA    | Y     | Y     | Y     | NA    | moderate/high |
| Shin et al. (2005) <sup>85</sup>              | Y     | NA    | Y     | Y     | NA    | Y     | Y     | Y     | NA    | low           |
| Meltzer et al. (2008) <sup>86</sup>           | Y     | NA    | Y     | Y     | NA    | Y     | Y     | Y     | NA    | low           |
| Petersen & Burnett (2008) <sup>87</sup>       | Y     | NA    | Y     | Y     | NA    | Y     | Y     | Y     | NA    | low           |
| Skegg et al. (2010) <sup>88</sup>             | Y     | NA    | N     | Y     | NA    | Y     | Y     | Y     | NA    | moderate/high |
| Aasland et al. (2011) <sup>23,89</sup>        | Y     | NA    | N     | Y     | NA    | Y     | Y     | Y     | NA    | moderate/high |
| Palhares-Alves et al. (2015) <sup>90</sup>    | Y     | NA    | Y     | Y     | NA    | Y     | Y     | N     | NA    | moderate/high |
| Claessens (2016) <sup>91</sup>                | Y     | NA    | N     | N     | NA    | Y     | Y     | Y     | NA    | moderate/high |
| Davis et al. A (2021) <sup>92</sup>           | Y     | NA    | Y     | Y     | NA    | Y     | Y     | Y     | NA    | low           |
| Davis et al. B (2021) <sup>92</sup>           | Y     | NA    | Y     | Y     | NA    | Y     | Y     | Y     | NA    | low           |
| Gold et al. (2021) <sup>93</sup>              | Y     | NA    | Y     | Y     | NA    | Y     | Y     | Y     | NA    | low           |
| Ye et al. (2021) <sup>94</sup>                | Y     | NA    | Y     | Y     | NA    | Y     | Y     | Y     | NA    | low           |
| Herrero-Huertas et al. (2022) <sup>95</sup>   | Y     | NA    | Y     | Y     | NA    | Y     | Y     | Y     | NA    | low           |
| FSO Switzerland, 2008-2020 <sup>96,97</sup>   | Y     | NA    | Y     | Y     | NA    | Y     | Y     | Y     | NA    | low           |
| ONS England, 2011-2020 <sup>98</sup>          | Y     | NA    | Y     | Y     | NA    | Y     | Y     | Y     | NA    | low           |
| Petrie et al. (2023) <sup>99</sup>            | Y     | NA    | Y     | Y     | NA    | Y     | Y     | Y     | NA    | low           |
| Zimmermann et al. (2023) <sup>100</sup>       | Y     | NA    | Y     | Y     | NA    | Y     | Y     | Y     | NA    | low           |

\* JBI 1-9 refers to the respective questions of the JBI Critical Appraisal Checklist for Studies Reporting Prevalence Data (as specified in Table S3a/b), answer categories: Yes (Y), No (N), Unclear (U), Not applicable (NA). Bias risk was assessed as low when all applicable JBI questions were answered with Yes.

**Table S4b: Risk of bias assessment based on the adapted JBI Checklist (studies on female physicians)\***

| Study                                       | JBI 1 | JBI 2 | JBI 3 | JBI 4 | JBI 5 | JBI 6 | JBI 7 | JBI 8 | JBI 9 | Bias risk     |
|---------------------------------------------|-------|-------|-------|-------|-------|-------|-------|-------|-------|---------------|
| Craig & Pitts (1968) <sup>63</sup>          | U     | NA    | N     | N     | NA    | U     | N     | N     | NA    | moderate/high |
| Pitts et al. (1979) <sup>101</sup>          | U     | NA    | Y     | N     | NA    | N     | N     | N     | NA    | moderate/high |
| Bämayer & Feuerlein (1986) <sup>69</sup>    | Y     | NA    | Y     | Y     | NA    | U     | N     | Y     | NA    | moderate/high |
| OPCS England & Wales (1986) <sup>70</sup>   | Y     | NA    | N     | Y     | NA    | Y     | Y     | N     | NA    | moderate/high |
| Arnetz et al. (1987) <sup>72</sup>          | Y     | NA    | N     | Y     | NA    | Y     | Y     | Y     | NA    | moderate/high |
| Stefansson & Wicks (1991) <sup>76</sup>     | Y     | NA    | Y     | Y     | NA    | Y     | Y     | N     | NA    | moderate/high |
| Herner (1993) <sup>78</sup>                 | N     | NA    | N     | N     | NA    | N     | N     | N     | NA    | moderate/high |
| Lindeman et al. (1997) <sup>79</sup>        | Y     | NA    | N     | Y     | NA    | Y     | Y     | Y     | NA    | moderate/high |
| Juel et al. (1999) <sup>81</sup>            | Y     | NA    | Y     | Y     | NA    | Y     | Y     | Y     | NA    | low           |
| Hawton et al. (2001) <sup>82</sup>          | Y     | NA    | N     | Y     | NA    | Y     | Y     | Y     | NA    | moderate/high |
| Innos et al. (2002) <sup>84</sup>           | N     | NA    | Y     | Y     | NA    | Y     | Y     | Y     | NA    | moderate/high |
| Shin et al. (2005) <sup>85</sup>            | Y     | NA    | N     | Y     | NA    | Y     | Y     | Y     | NA    | moderate/high |
| Meltzer et al. (2008) <sup>86</sup>         | Y     | NA    | Y     | Y     | NA    | Y     | Y     | Y     | NA    | low           |
| Petersen & Burnett (2008) <sup>87</sup>     | Y     | NA    | Y     | Y     | NA    | Y     | Y     | Y     | NA    | low           |
| Skegg et al. (2010) <sup>88</sup>           | Y     | NA    | N     | Y     | NA    | Y     | Y     | Y     | NA    | moderate/high |
| Aasland et al. (2011) <sup>23,89</sup>      | Y     | NA    | N     | Y     | NA    | Y     | Y     | Y     | NA    | moderate/high |
| Palhares-Alves et al. (2015) <sup>90</sup>  | Y     | NA    | Y     | Y     | NA    | Y     | Y     | N     | NA    | moderate/high |
| Claessens (2016) <sup>91</sup>              | Y     | NA    | N     | N     | NA    | Y     | Y     | Y     | NA    | moderate/high |
| Davis et al. A (2021) <sup>92</sup>         | Y     | NA    | Y     | Y     | NA    | Y     | Y     | Y     | NA    | low           |
| Davis et al. B (2021) <sup>92</sup>         | Y     | NA    | Y     | Y     | NA    | Y     | Y     | Y     | NA    | low           |
| Gold et al. (2021) <sup>93</sup>            | Y     | NA    | Y     | Y     | NA    | Y     | Y     | Y     | NA    | low           |
| Ye et al. (2021) <sup>94</sup>              | Y     | NA    | Y     | Y     | NA    | Y     | Y     | Y     | NA    | low           |
| Herrero-Huertas et al. (2022) <sup>95</sup> | Y     | NA    | Y     | Y     | NA    | Y     | Y     | Y     | NA    | low           |
| FSO Switzerland, 2008-2020 <sup>96,97</sup> | Y     | NA    | Y     | Y     | NA    | Y     | Y     | Y     | NA    | low           |
| ONS England, 2011-2020 <sup>98</sup>        | Y     | NA    | Y     | Y     | NA    | Y     | Y     | Y     | NA    | low           |
| Petrie et al. (2023) <sup>99</sup>          | Y     | NA    | Y     | Y     | NA    | Y     | Y     | Y     | NA    | low           |
| Zimmermann et al. (2023) <sup>100</sup>     | Y     | NA    | Y     | Y     | NA    | Y     | Y     | Y     | NA    | low           |

\* JBI 1-9 refers to the respective questions of the JBI Critical Appraisal Checklist for Studies Reporting Prevalence Data (as specified in Table S3a/b), answer categories: Yes (Y), No (N), Unclear (U), Not applicable (NA). Bias risk was assessed as low when all applicable JBI questions were answered with Yes.

**Table S5a: Additional study characteristics used for sensitivity analysis (male physicians)**

| Study                                       | Study design* | Outcome measure† | Level of age standardisation§ | Suicide classification¶ | Upper age cut-off | Reference group |
|---------------------------------------------|---------------|------------------|-------------------------------|-------------------------|-------------------|-----------------|
| Lindhardt et al. (1963) <sup>62</sup>       | registry      | SMR‡             | detailed                      | unclear                 | no                | gen pop         |
| Craig & Pitts (1968) <sup>63</sup>          | registry      | RR‡              | other                         | unclear                 | no                | other           |
| Dean (1969) <sup>64</sup>                   | registry      | SMR‡             | detailed                      | narrow                  | no                | other           |
| Rich & Pitts (1979) <sup>65</sup>           | registry      | RR‡              | other                         | unclear                 | no                | other           |
| Balogh (1981) <sup>66</sup>                 | registry      | SRR‡             | detailed                      | unclear                 | no                | gen pop         |
| Enstrom (1983) <sup>67</sup>                | RB cohort     | SMR              | detailed                      | narrow                  | no                | other           |
| Revicki & May (1985) <sup>68</sup>          | registry      | SMR‡             | detailed                      | unclear                 | no                | other           |
| Bämayer & Feuerlein (1986) <sup>69</sup>    | registry      | SMR‡             | detailed                      | narrow                  | no                | gen pop         |
| OPCS England & Wales A (1986) <sup>70</sup> | registry      | SMR              | detailed                      | wide                    | yes               | gen pop         |

|                                               |           |      |          |         |     |         |
|-----------------------------------------------|-----------|------|----------|---------|-----|---------|
| OPCS England & Wales B (1986) <sup>70</sup>   | registry  | SMR  | detailed | wide    | yes | gen pop |
| OPCS England & Wales C (1986) <sup>70</sup>   | registry  | SMR  | detailed | wide    | yes | gen pop |
| OPCS Great Britain (1986) <sup>70</sup>       | registry  | SMR  | detailed | wide    | yes | gen pop |
| Richings et al. (1986) <sup>71</sup>          | registry  | SMR  | detailed | narrow  | no  | gen pop |
| Arnetz et al. (1987) <sup>72</sup>            | RB cohort | SMR  | detailed | narrow  | yes | gen pop |
| Rimpelä et al. (1987) <sup>73</sup>           | RB cohort | SRR‡ | detailed | wide    | yes | other   |
| Kono et al. (1988) <sup>74</sup>              | cohort    | SMR  | detailed | narrow  | no  | gen pop |
| Schlicht et al. (1990) <sup>75</sup>          | cohort    | SMR  | detailed | unclear | no  | gen pop |
| Stefansson & Wicks (1991) <sup>76</sup>       | RB cohort | SRR‡ | detailed | wide    | yes | other   |
| Shima et al. (1992) <sup>77</sup>             | RB cohort | SMR  | detailed | unclear | no  | other   |
| Herner (1993) <sup>78</sup>                   | registry  | RR‡  | other    | wide    | no  | gen pop |
| Lindeman et al. (1997) <sup>79</sup>          | registry  | SMR  | detailed | narrow  | no  | gen pop |
| Rafnsson & Gunnarsdottir (1998) <sup>80</sup> | RB cohort | SMR‡ | detailed | narrow  | no  | gen pop |
| Juel et al. (1999) <sup>81</sup>              | registry  | SMR  | detailed | narrow  | no  | gen pop |
| Hawton et al. (2001) <sup>82</sup>            | registry  | SMR  | detailed | wide    | yes | gen pop |
| Hostettler & Minder (2002) <sup>83</sup>      | registry  | SMR  | detailed | unclear | yes | gen pop |
| Innos et al. (2002) <sup>84</sup>             | cohort    | SMR  | detailed | narrow  | no  | gen pop |
| Shin et al. (2005) <sup>85</sup>              | registry  | SMR  | detailed | unclear | yes | other   |
| Meltzer et al. (2008) <sup>86</sup>           | registry  | SMR  | detailed | wide    | yes | gen pop |
| Petersen & Burnett (2008) <sup>87</sup>       | registry  | SRR  | detailed | unclear | yes | other   |
| Skegg et al. (2010) <sup>88</sup>             | registry  | SMR  | detailed | wide    | yes | other   |
| Aasland et al. (2011) <sup>23,89</sup>        | registry  | SRR  | detailed | narrow  | no  | gen pop |
| Palhares-Alves et al. (2015) <sup>90</sup>    | registry  | RR‡  | other    | narrow  | no  | gen pop |
| Claessens (2016) <sup>91</sup>                | registry  | RR‡  | other    | wide    | no  | gen pop |
| Davis et al. A (2021) <sup>92</sup>           | registry  | RR‡  | other    | narrow  | no  | gen pop |
| Davis et al. B (2021) <sup>92</sup>           | registry  | RR‡  | other    | narrow  | no  | gen pop |
| Gold et al. (2021) <sup>93</sup>              | registry  | SMR‡ | detailed | narrow  | no  | other   |
| Ye et al. (2021) <sup>94</sup>                | registry  | SRR‡ | detailed | narrow  | no  | other   |
| Herrero-Huertas et al. (2022) <sup>95</sup>   | RB cohort | SRR‡ | detailed | narrow  | no  | other   |
| FSO Switzerland, 2008-2020 <sup>96,97</sup>   | registry  | SMR‡ | detailed | narrow  | no  | gen pop |
| ONS England, 2011-2020 <sup>98</sup>          | registry  | SRR‡ | detailed | wide    | yes | gen pop |
| Petrie et al. (2023) <sup>99</sup>            | registry  | SRR‡ | detailed | narrow  | yes | other   |
| Zimmermann et al. (2023) <sup>100</sup>       | registry  | SMR  | detailed | narrow  | yes | gen pop |

\* Categories: registry study, registry-based cohort study, cohort study.

† Categories: rate ratio (RR), standardised mortality ratio (SMR), standardised rate ratio (SRR).

‡ Effect estimate calculated by the reviewers.

§ Categories: detailed (several age groups used for standardisation), other (one age group or age-cut off used for standardisation).

¶ Categories: narrow (suicides without deaths of undetermined intent), wide (suicides and deaths of undetermined intent), unclear (not specified).

|| Categories: general population, other (white, economically active, working, or employed population).



**Table S5b: Additional study characteristics used for sensitivity analysis (female physicians)**

| Study                                       | Study design* | Outcome measure† | Level of age standardisation§ | Suicide classification¶ | Upper age cut-off | Reference group |
|---------------------------------------------|---------------|------------------|-------------------------------|-------------------------|-------------------|-----------------|
| Craig & Pitts (1968) <sup>63</sup>          | registry      | RR‡              | other                         | unclear                 | no                | other           |
| Pitts et al. (1979) <sup>101</sup>          | registry      | RR‡              | other                         | unclear                 | no                | other           |
| Bämayr & Feuerlein (1986) <sup>69</sup>     | registry      | SMR‡             | detailed                      | narrow                  | no                | gen pop         |
| OPCS England & Wales (1986) <sup>70</sup>   | registry      | SMR              | detailed                      | wide                    | no                | gen pop         |
| Arnetz et al. (1987) <sup>72</sup>          | RB cohort     | SMR              | detailed                      | narrow                  | yes               | gen pop         |
| Stefansson & Wicks (1991) <sup>76</sup>     | RB cohort     | SRR‡             | detailed                      | wide                    | yes               | other           |
| Herner (1993) <sup>78</sup>                 | registry      | RR‡              | other                         | wide                    | no                | gen pop         |
| Lindeman et al. (1997) <sup>79</sup>        | registry      | SMR              | detailed                      | narrow                  | no                | gen pop         |
| Juel et al. (1999) <sup>81</sup>            | registry      | SMR              | detailed                      | narrow                  | no                | gen pop         |
| Hawton et al. (2001) <sup>82</sup>          | registry      | SMR              | detailed                      | wide                    | yes               | gen pop         |
| Innos et al. (2002) <sup>84</sup>           | cohort        | SMR              | detailed                      | narrow                  | no                | gen pop         |
| Shin et al. (2005) <sup>85</sup>            | registry      | SMR              | detailed                      | unclear                 | yes               | other           |
| Meltzer et al. (2008) <sup>86</sup>         | registry      | SMR              | detailed                      | wide                    | yes               | gen pop         |
| Petersen & Burnett (2008) <sup>87</sup>     | registry      | SRR              | detailed                      | unclear                 | yes               | other           |
| Skegg et al. (2010) <sup>88</sup>           | registry      | SMR              | detailed                      | wide                    | yes               | other           |
| Aasland et al. (2011) <sup>23,89</sup>      | registry      | SRR              | detailed                      | narrow                  | no                | gen pop         |
| Palhares-Alves et al. (2015) <sup>90</sup>  | registry      | RR‡              | other                         | narrow                  | no                | gen pop         |
| Claessens (2016) <sup>91</sup>              | registry      | RR‡              | other                         | wide                    | no                | gen pop         |
| Davis et al. A (2021) <sup>92</sup>         | registry      | RR‡              | other                         | narrow                  | no                | gen pop         |
| Davis et al. B (2021) <sup>92</sup>         | registry      | RR‡              | other                         | narrow                  | no                | gen pop         |
| Gold et al. (2021) <sup>93</sup>            | registry      | SMR‡             | detailed                      | narrow                  | no                | other           |
| Ye et al. (2021) <sup>94</sup>              | registry      | SRR‡             | detailed                      | narrow                  | no                | other           |
| Herrero-Huertas et al. (2022) <sup>95</sup> | RB cohort     | SRR‡             | detailed                      | narrow                  | no                | other           |
| FSO Switzerland, 2008-2020 <sup>96,97</sup> | registry      | SMR‡             | detailed                      | narrow                  | no                | gen pop         |
| ONS England, 2011-2020 <sup>98</sup>        | registry      | SRR‡             | detailed                      | wide                    | yes               | gen pop         |
| Petrie et al. (2023) <sup>99</sup>          | registry      | SRR‡             | detailed                      | narrow                  | yes               | other           |
| Zimmermann et al. (2023) <sup>100</sup>     | registry      | SMR              | detailed                      | narrow                  | yes               | gen pop         |

\* Categories: registry study, registry-based cohort study, cohort study.

† Categories: rate ratio (RR), standardised mortality ratio (SMR), standardised rate ratio (SRR).

‡ Effect estimate calculated by the reviewers.

§ Categories: detailed (several age groups used for standardisation), other (one age group or age-cut off used for standardisation).

¶ Categories: narrow (suicides without deaths of undetermined intent), wide (suicides and deaths of undetermined intent), unclear (not specified).

|| Categories: general population, other (white, economically active, working, or employed population).

**Figure S1a: Cumulative meta-analysis based on midpoint of observation period (male physicians)**

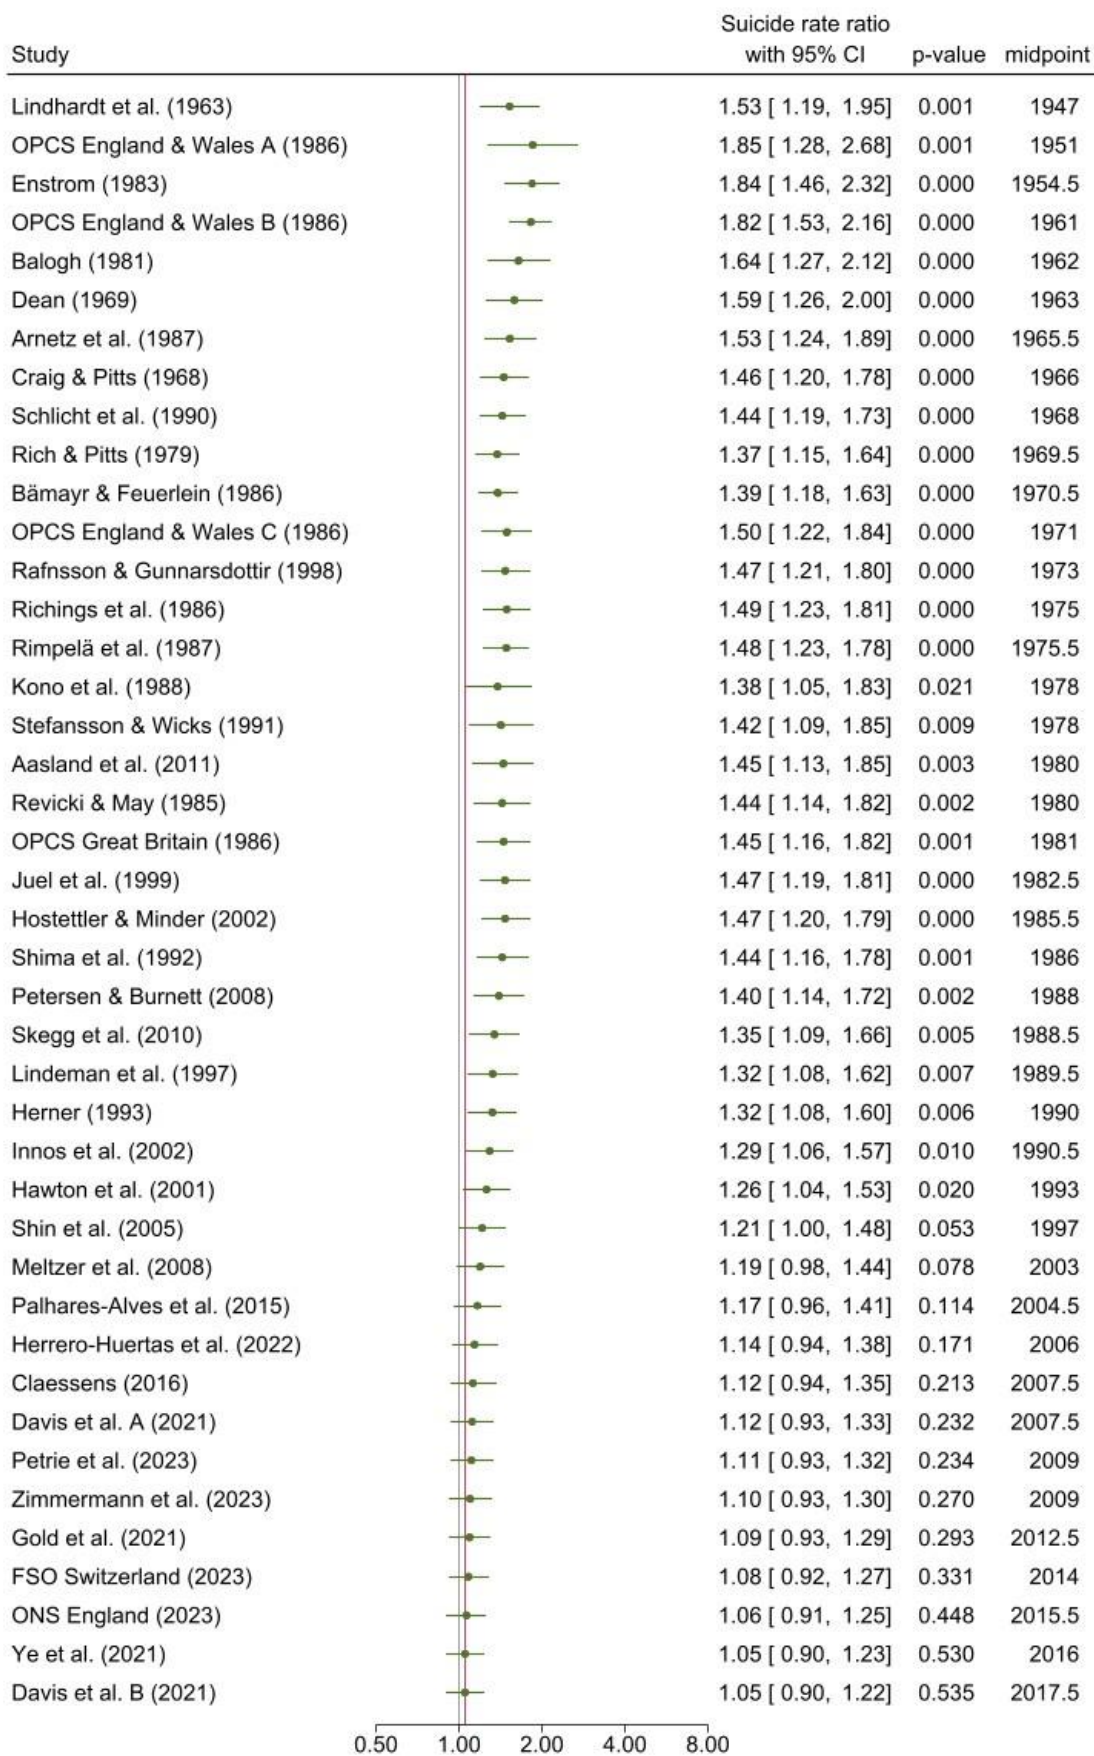

Random-effects Sidik-Jonkman model

**Figure S1b: Cumulative meta-analysis based on midpoint of observation period (female physicians)**

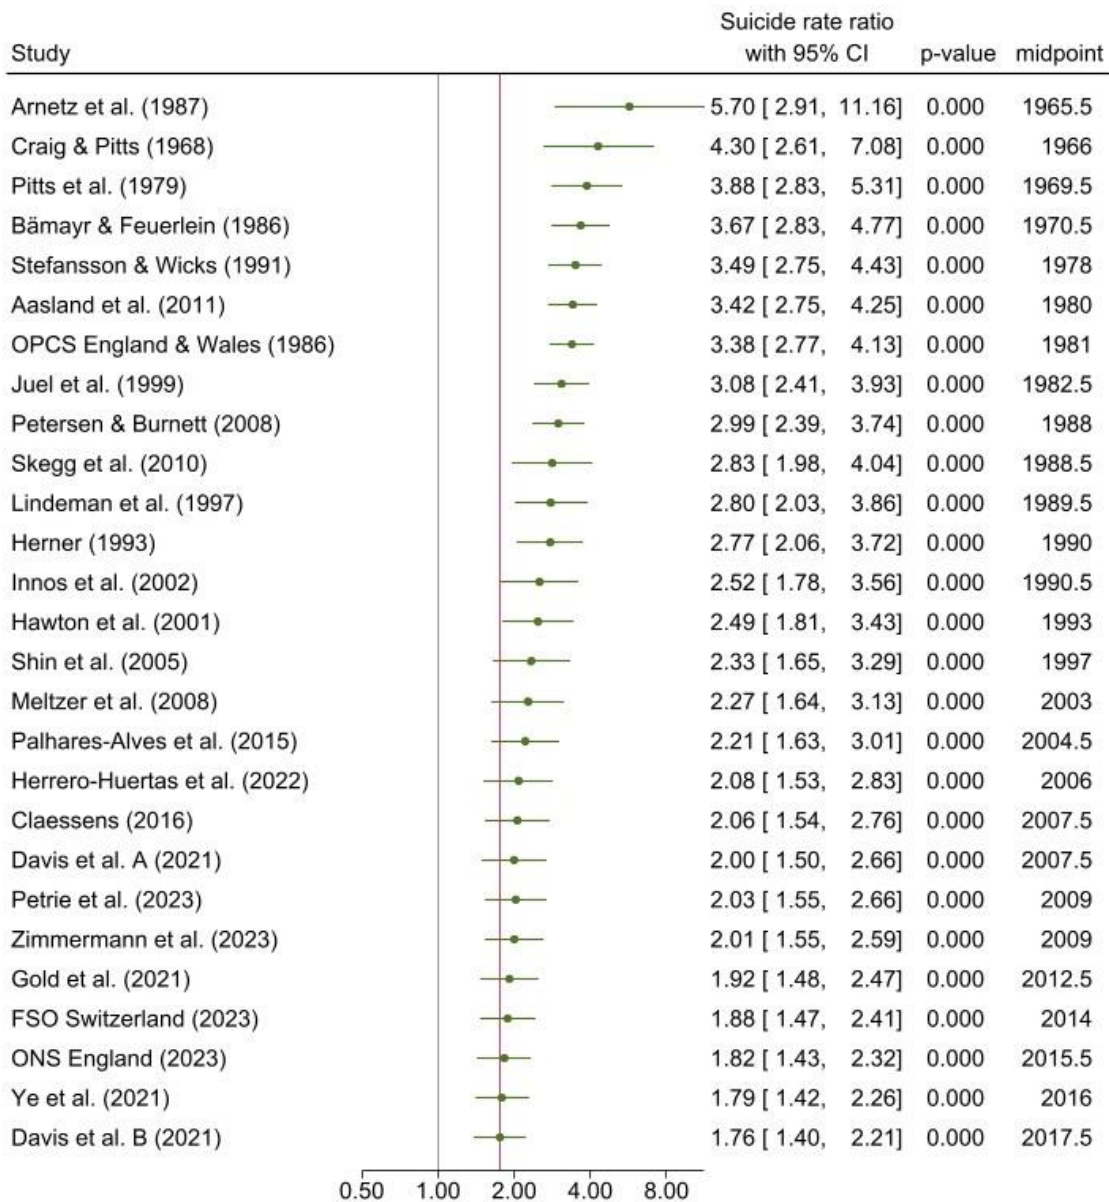

Random-effects Sidik-Jonkman model

**Figure S2a: Funnel plot (male physicians)**

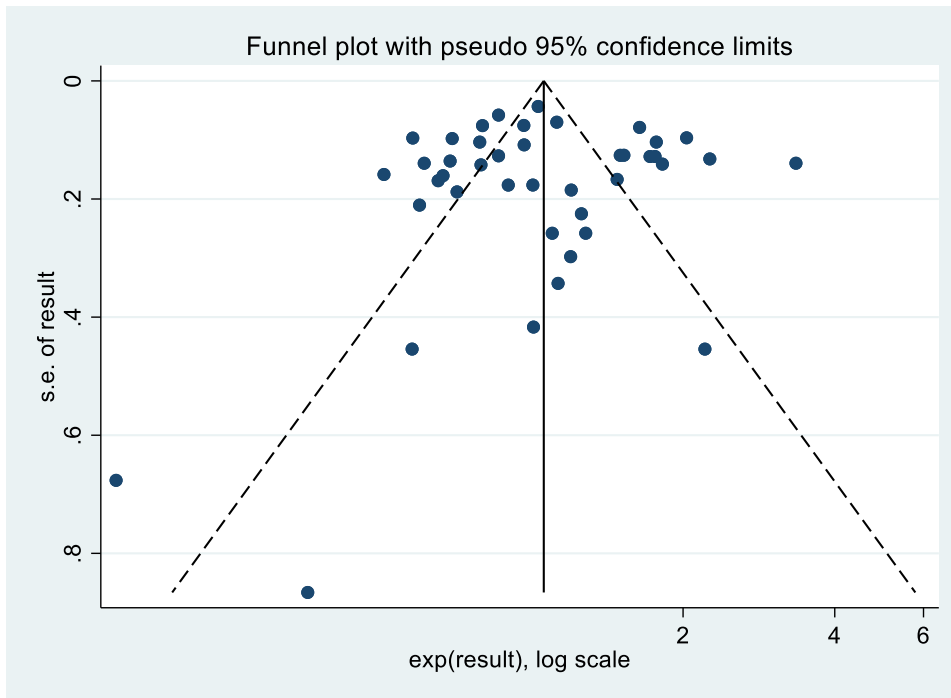

**Figure S2b: Funnel plot (female physicians)**

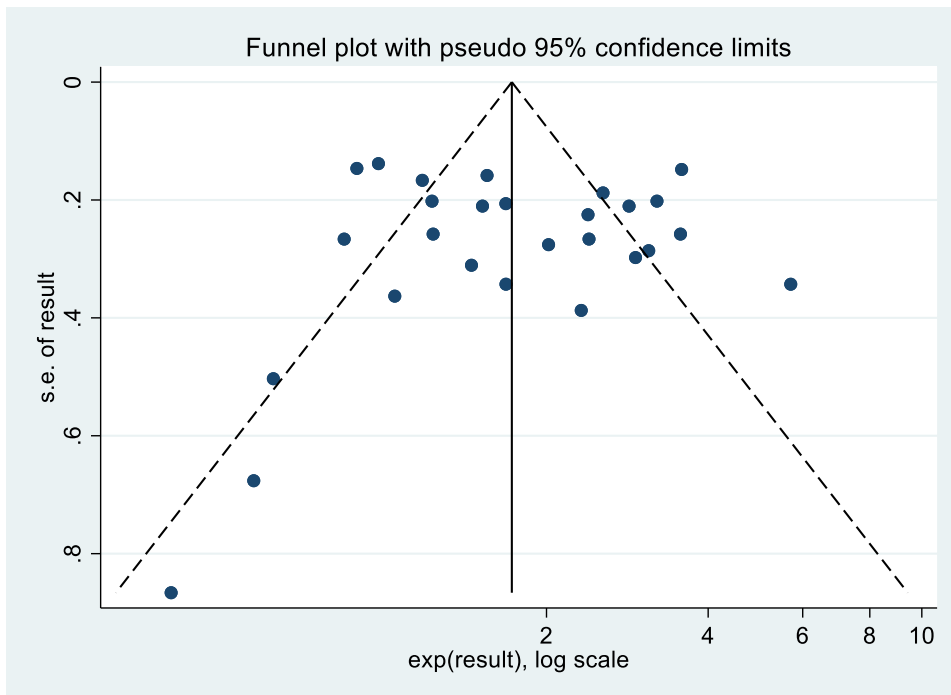

**Figure S3a: Subgroup analysis for geographic region, WHO regions (male physicians)**

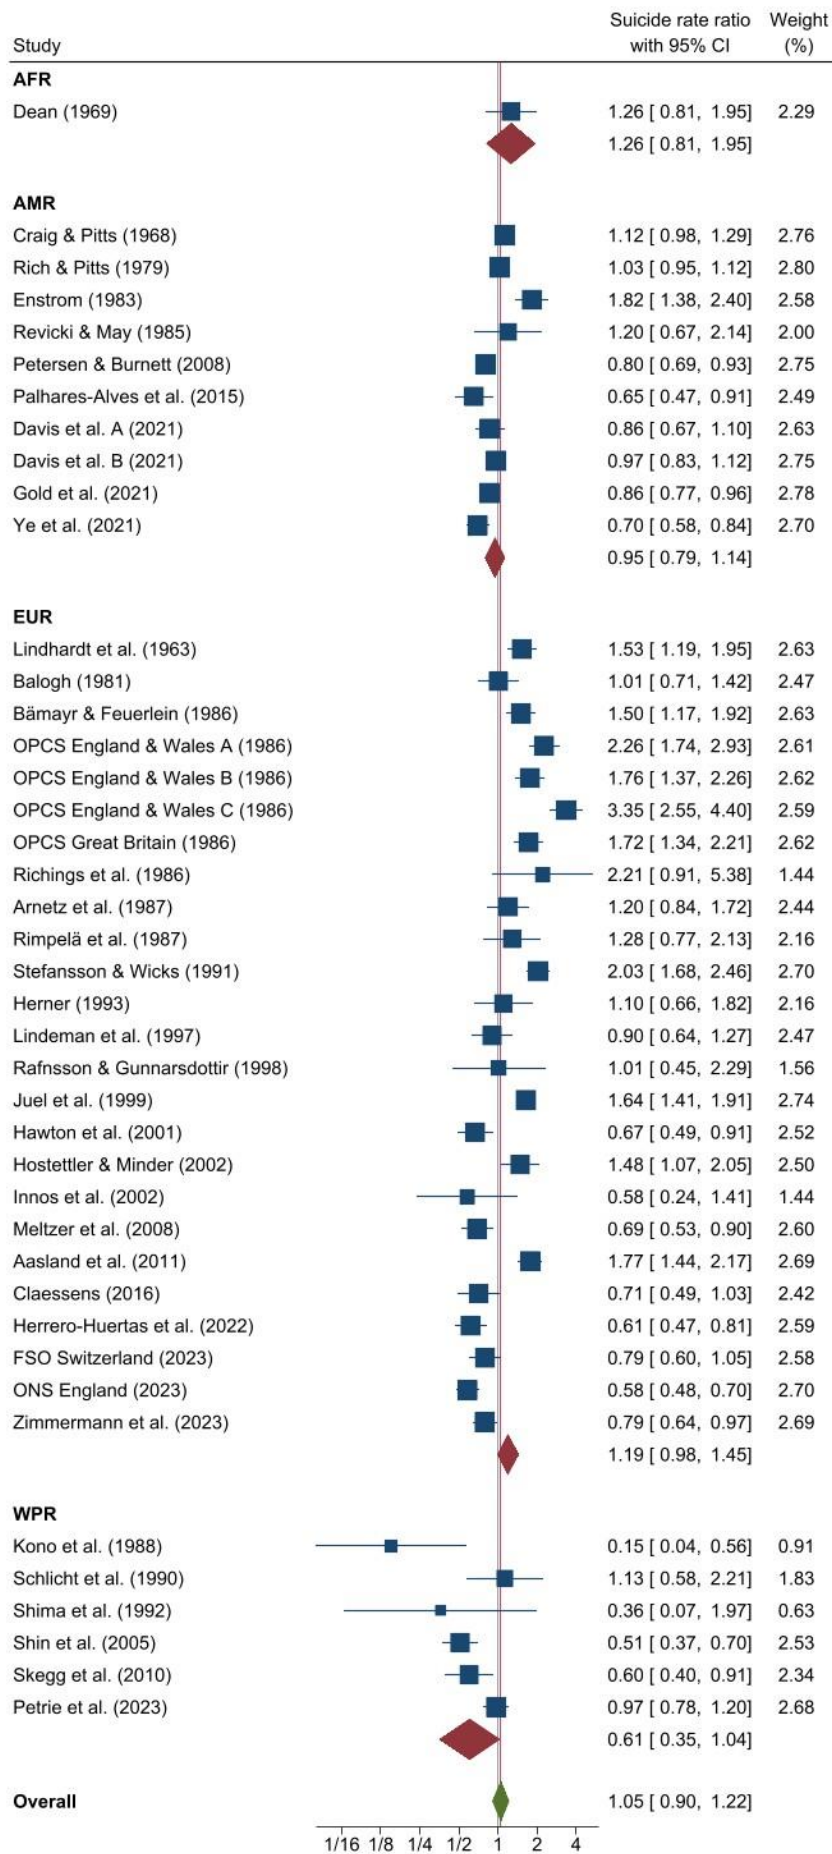

Random-effects Sidik-Jonkman model



**Figure S3b: Subgroup analysis for geographic region, WHO regions (female physicians)**

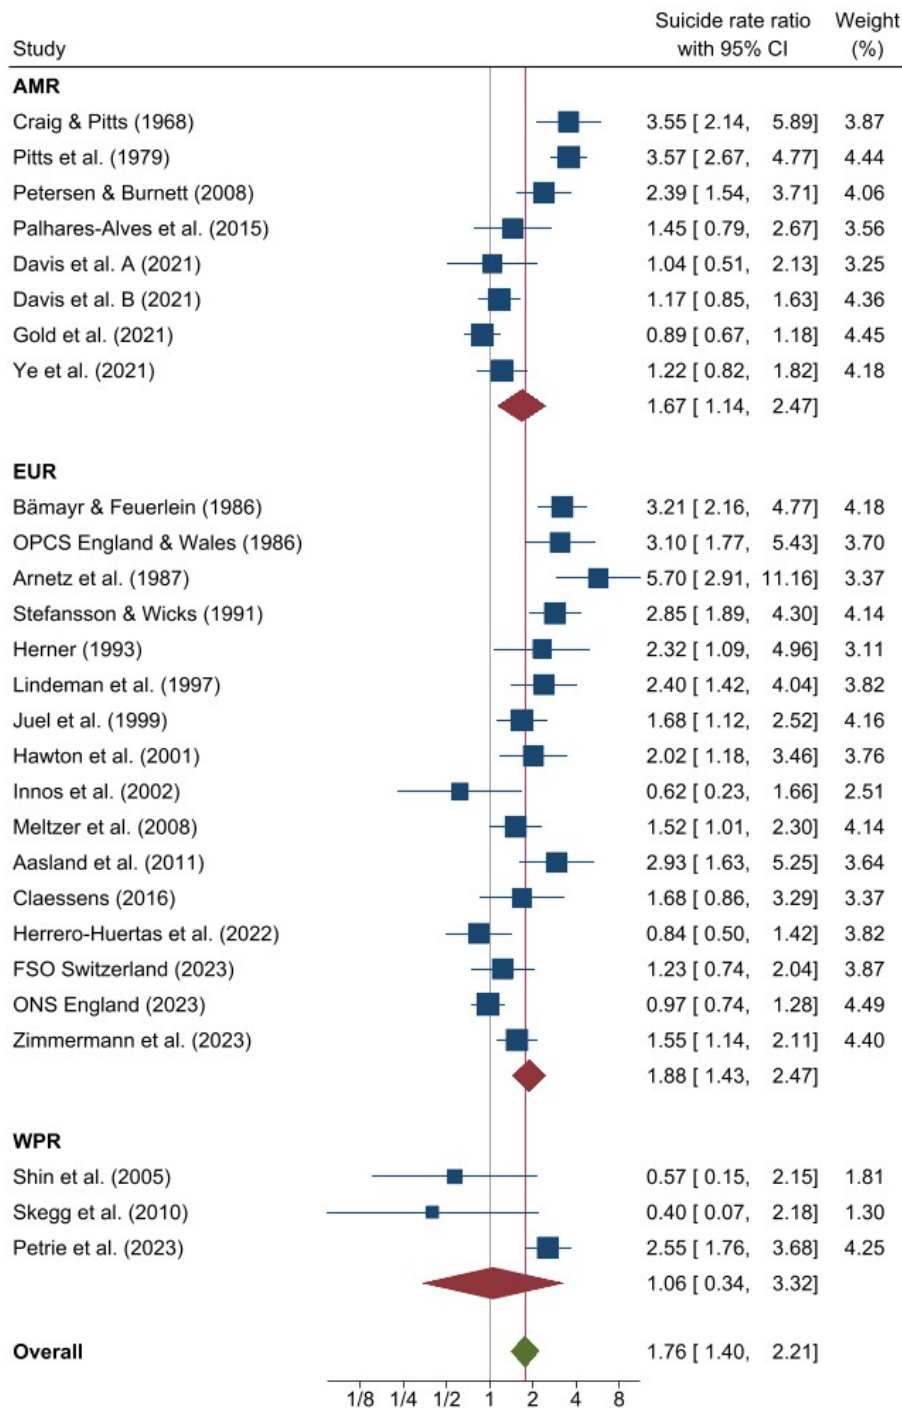

Random-effects Sidik-Jonkman model

**Figure S4a: Subgroup analysis for geographic region, most common study origin regions (male physicians)**

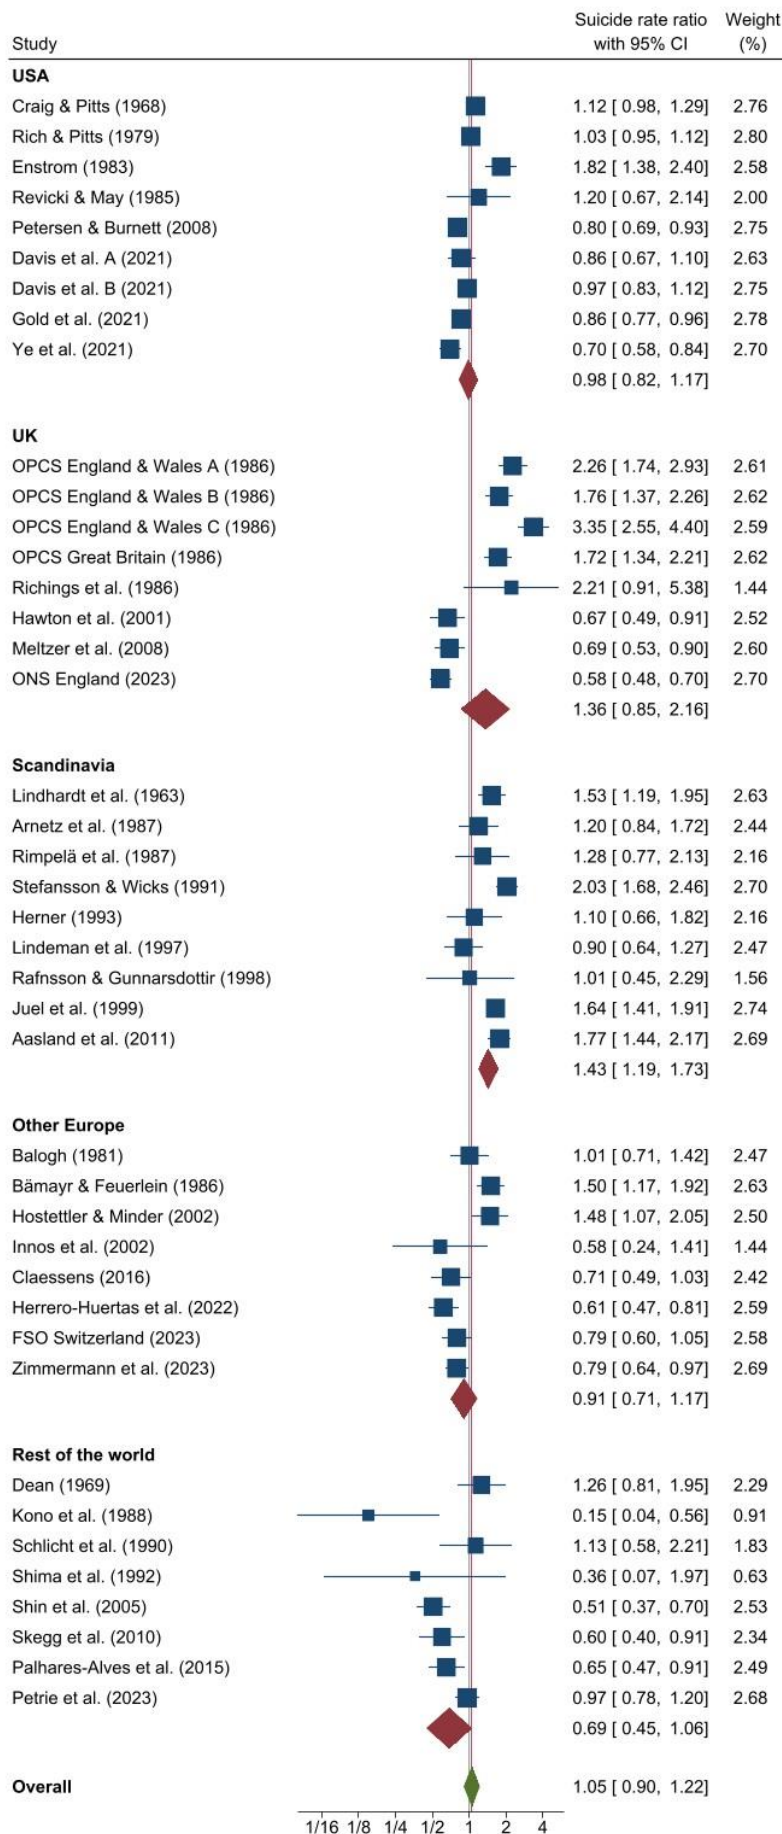

Random-effects Sidik-Jonkman model

**Figure S4b: Subgroup analysis for geographic region, most common study origin regions (female physicians)**

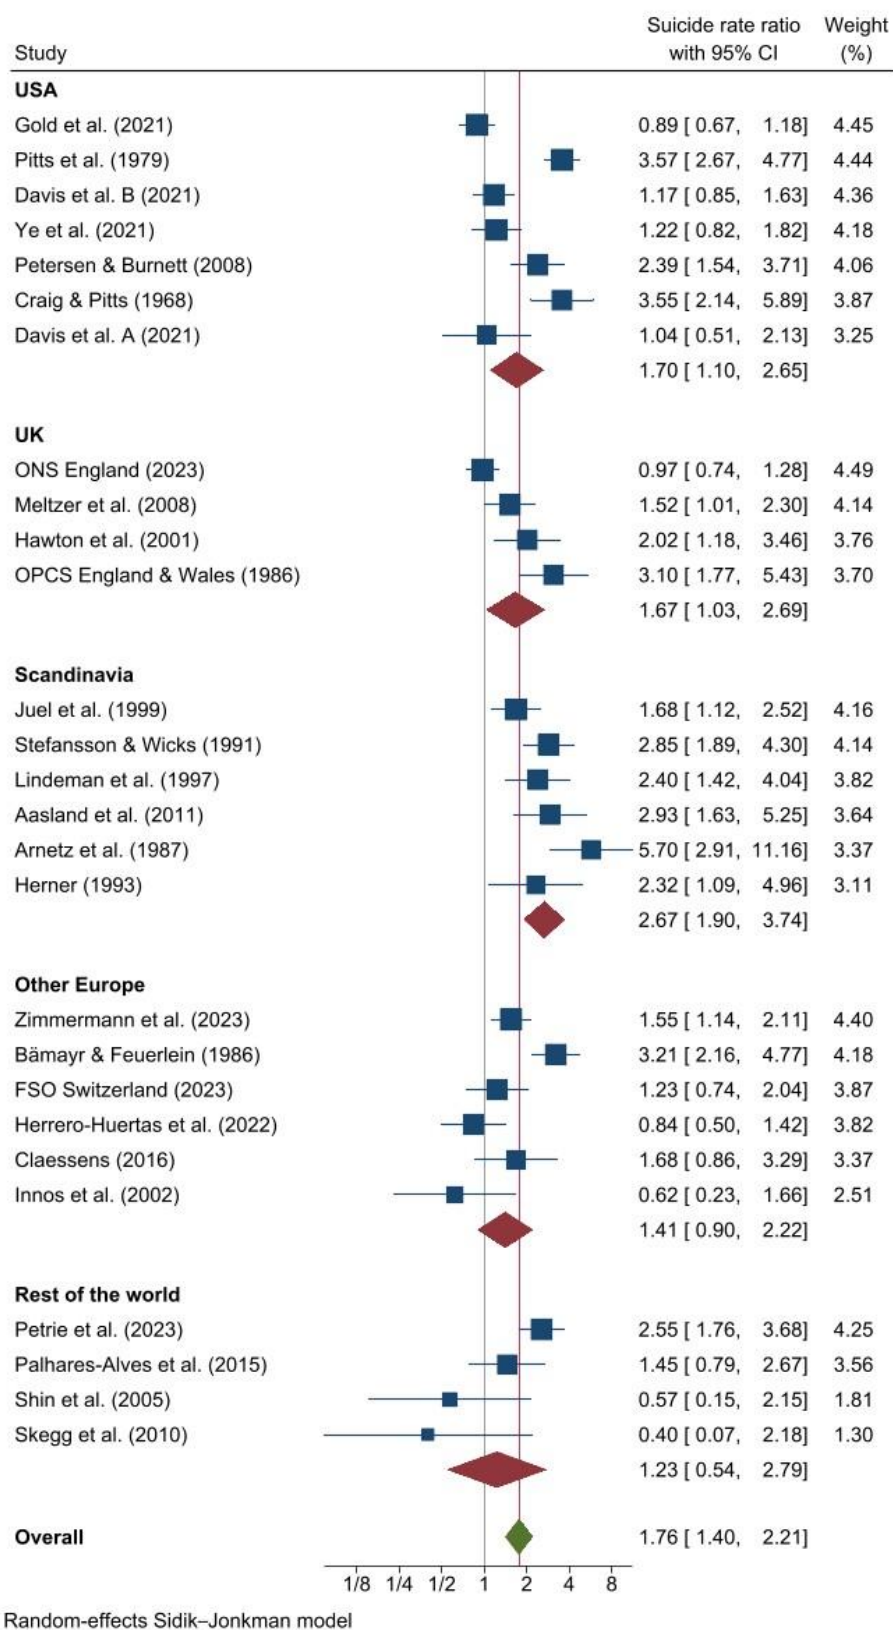

Random-effects Sidik-Jonkman model



**Figure S5a: Forest plot with subgroup analysis for older and recent studies (male physicians)**

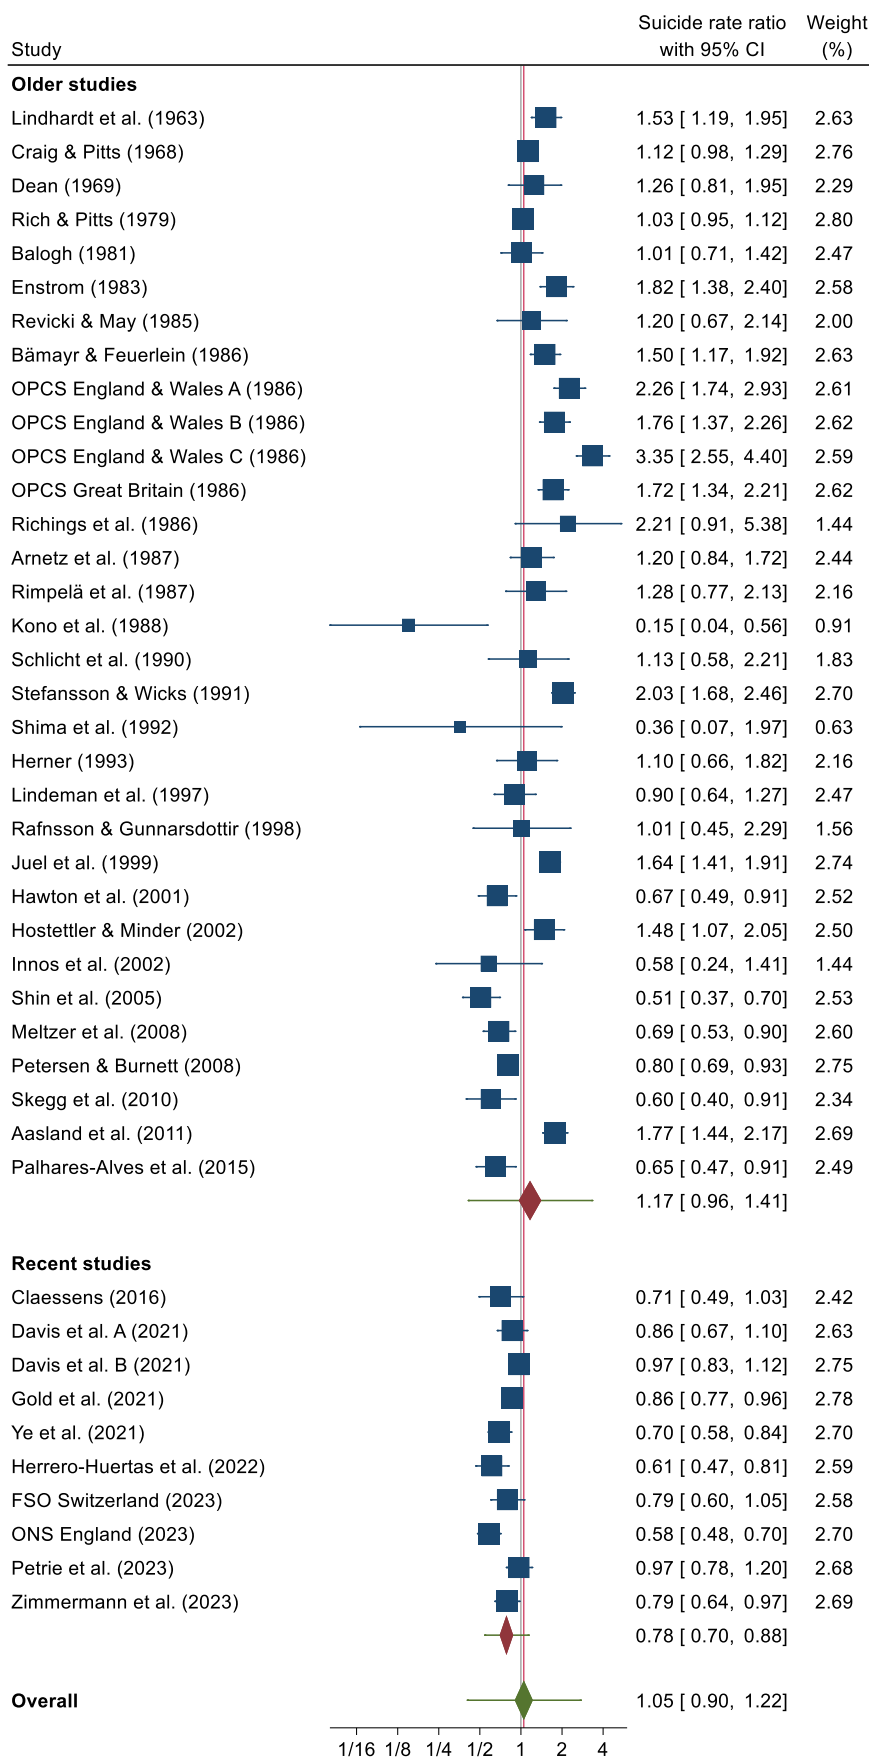

Random-effects Sidik-Jonkman model  
95% prediction intervals

**Figure S5b: Forest plot with subgroup analysis for older and recent studies (female physicians)**

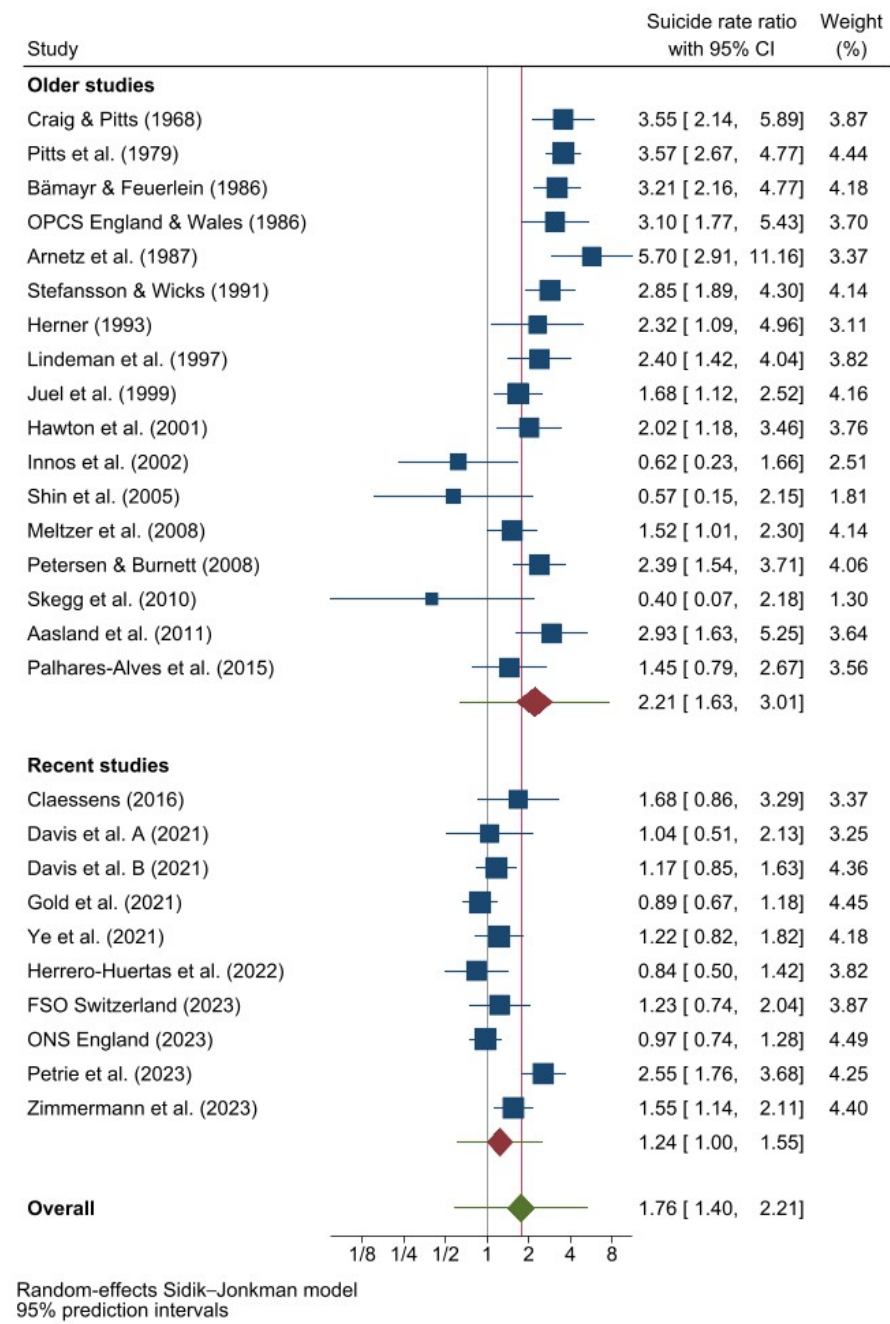

**Figure S6: Forest plot with suicide rate ratios of male physicians (reference: group of other professions of similar socioeconomic/educational level)**

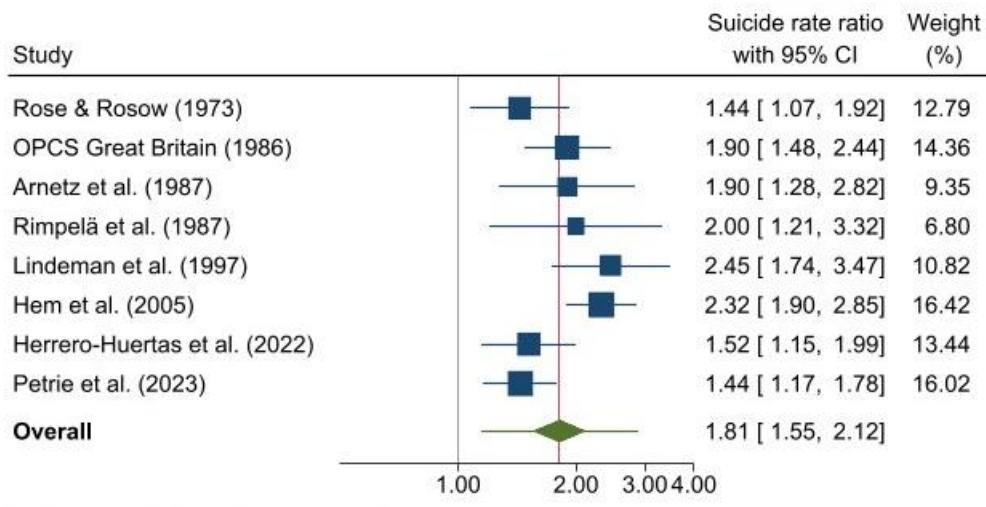

Random-effects Sidik-Jonkman model  
95% prediction interval

**Table S6: Characteristics of included studies for secondary meta-analysis**

**Studies on male physicians**

| Study                                       | Location        | Time period             | Suicides | Effect | 95% CI*   | Measure | R1   | R2   | O  | E    | SE†   | Reference group            |
|---------------------------------------------|-----------------|-------------------------|----------|--------|-----------|---------|------|------|----|------|-------|----------------------------|
| Rose & Rosow (1973) <sup>45</sup>           | California, USA | 1959-1961               | 49       | 1.44   | 1.06-1.90 | SRR‡    | 79   | 55   | 49 | 34.1 | 0.148 | other professionals        |
| OPCS Great Britain (1986) <sup>70</sup>     | UK              | 1979-1983<br>(ex. 1981) | 65       | 1.90   | 1.47-2.42 | SMR     |      |      | 65 | 34.2 | 0.128 | social class I             |
| Arnetz et al. (1987) <sup>72</sup>          | Sweden          | 1961-1970               | 32       | 1.90   | 1.30-2.86 | SMR     |      |      | 32 | 16.8 | 0.201 | other academics            |
| Rimpelä et al. (1987) <sup>73</sup>         | Finland         | 1971-1980               | 17       | 2.00   | 1.17-3.20 | SRR‡    |      |      | 17 | 8.5  | 0.258 | other professionals        |
| Lindeman et al. (1997) <sup>79</sup>        | Finland         | 1986-1993               | 35       | 2.45   | 1.71-3.41 | RR‡     | 54   | 22   | 35 | 14.3 | 0.176 | other professionals        |
| Hem et al. (2005) <sup>23,89</sup>          | Norway          | 1960-2000               | 98       | 2.32   | 1.89-2.83 | RR‡     | 43   | 18.5 | 98 | 42.2 | 0.104 | other graduates            |
| Herrero-Huertas et al. (2022) <sup>95</sup> | Spain           | 2001-2011               | 55       | 1.52   | 1.14-1.97 | SRR‡    | 1    | 0.66 | 55 | 36.3 | 0.140 | other higher professions   |
| Petrie et al. (2023) <sup>99</sup>          | Australia       | 2001-2017               | 90       | 1.44   | 1.16-1.77 | SRR‡    | 15.0 | 10.4 | 90 | 62.4 | 0.108 | other health professionals |

**Studies on female physicians**

| Study                                       | Location  | Time period | Suicides | Effect | 95% CI*   | Measure | R1   | R2   | O  | E    | SE†   | Reference group            |
|---------------------------------------------|-----------|-------------|----------|--------|-----------|---------|------|------|----|------|-------|----------------------------|
| Arnetz et al. (1987) <sup>72</sup>          | Sweden    | 1961-1970   | 10       | 4.50   | 2.16-8.18 | SMR     |      |      | 10 | 2.2  | 0.340 | other academics            |
| Lindeman et al. (1997) <sup>79</sup>        | Finland   | 1986-1993   | 16       | 3.50   | 2.00-5.68 | RR‡     | 35   | 10   | 16 | 4.6  | 0.266 | other professionals        |
| Hem et al. (2005) <sup>23,89</sup>          | Norway    | 1960-2000   | 13       | 2.25   | 1.20-3.85 | RR‡     | 26.1 | 11.6 | 13 | 5.8  | 0.298 | other graduates            |
| Herrero-Huertas et al. (2022) <sup>95</sup> | Spain     | 2001-2011   | 16       | 1.16   | 0.66-1.89 | SRR‡    | 1    | 0.86 | 16 | 13.8 | 0.266 | other higher professions   |
| Petrie et al. (2023) <sup>99</sup>          | Australia | 2001-2017   | 31       | 2.26   | 1.53-3.20 | SRR‡    | 7.9  | 3.5  | 31 | 13.7 | 0.188 | other health professionals |

\* Confidence intervals calculated by the reviewers based on Fisher's exact test<sup>102</sup>

† Standard error calculated by the reviewers with the formula recommended by the Cochrane handbook<sup>103</sup>

‡ Effect estimate calculated by the reviewers

Abbreviations: R1 = rate of physician target population, R2 = rate of reference population, O = observed number of suicides, E = expected numbers of suicide

## References

1. Alexander BH, Checkoway H, Nagahama SI, Domino KB. Cause-specific mortality risks of anesthesiologists. *Anesthesiology*. 2000;93(4):922-930.
2. Andersen O, Laursen L, Petersen JK. *Dødelighed Og Erhverv 1981-1995*. Danmarks Statistik; 2001.
3. Andersen O, Laursen L, Petersen JK. *Dødelighed Og Erhverv 1996-2005 Med et Tilbageblik Til 1970*. Danmarks Statistik; 2009.
4. Arnetz B, Horte LG, Hedberg A, Malker H. [Suicide among dentists--results from a cohort study]. *Tandlakartidningen*. 1986;78(8):424-427.
5. Arnetz BB, Horte LG, Hedberg A, Malker H. Suicide among Swedish dentists. A ten-year follow-up study. *Scandinavian Journal of Social Medicine*. 1987;15(4):243-246.
6. Bamayr A, Feuerlein W. Committed suicides of 119 male and female physicians and dentists in Upper Bavaria in the period of 1963 to 1978. *Crisis: The Journal of Crisis Intervention and Suicide Prevention*. 1984;5(2):91-107.
7. Blachly PH, Osterud HT, Josslin R. Suicide in Professional Groups. *N Engl J Med*. 1963;268:1278-1282. doi:10.1056/NEJM196306062682307
8. Blachly P, Disher W, Roduner G. Suicide by physicians. *Bulletin of Suicidology*. Published online 1968:1-18.
9. Sakinofsky I. Suicide in doctors and wives of doctors. *Canadian Family Physician*. 1980;26:837-844.
10. Bruce DL, Eide KA, Linde HW, Eckenhoff JE. Causes of death among anesthesiologists: a 20-year survey. *Anesthesiology*. 1968;29(3):565-569.
11. Borgan JK, Kristofersen LB. *Dødelighet i Yrker Og Sosioøkonomiske Grupper: 1970 - 1980 = Mortality by Occupation and Socio-Economic Group in Norway 1970-1980*. Statistisk Sentralbyrå; 1986.
12. Burnett C, Maurer JD, Dosemeci M. *Mortality by Occupation, Industry, and Cause of Death. 24 Reporting States, (1984-1988)*. NIOSH; 1997. Accessed September 17, 2023. <https://stacks.cdc.gov/view/cdc/6384>
13. Carpenter LM, Swerdlow AJ, Fear NT. Mortality of doctors in different specialties: findings from a cohort of 20000 NHS hospital consultants. *Occupational and Environmental Medicine*. 1997;54(6):388-395. doi:10.1136/oem.54.6.388
14. De Hart C. Suicide by physicians. *Journal of the Maine Medical Association*. 1974;65(2):32-33.
15. Doll R, Peto R. Mortality among doctors in different occupations. *British Medical Journal*. 1977;1(6074):1433-1436.
16. Duarte D, El-Hagrassy MM, Couto T, et al. Physician suicide demographics and the COVID-19 pandemic. *Braz J Psychiatry*. 2022;44:124-135. doi:10.1590/1516-4446-2021-1865
17. Everson RB, Fraumeni JF Jr. Mortality among medical students and young physicians. *Journal of Medical Education*. 1975;50(8):809-811.
18. France O, Ugarte JM. [Causes of death in physicians of Santiago, Chile (author's transl)]. *Revista Medica de Chile*. 1977;105(11):792-801.
19. Frank E, Biola H, Burnett CA. Mortality rates and causes among U.S. physicians. *American Journal of Preventive Medicine*. 2000;19(3):155-159. doi:10.1016/S0749-3797(00)00201-4

20. Hall A, Harrington JM, Aw TC. Mortality study of British pathologists. *American Journal of Industrial Medicine*. 1991;20(1):83-89.
21. Harrington JM, Oakes D. Mortality study of British pathologists 1974-80. *British Journal of Industrial Medicine*. 1984;41(2):188-191.
22. Harrington JM, Shannon HS. Mortality study of pathologists and medical laboratory technicians. *British Medical Journal*. 1975;4(5992):329-332.
23. Hem E, Haldorsen T, Aasland GO, Tyssen R, Vaglum P, Ekeberg Ø. Suicide rates according to education with a particular focus on physicians in Norway 1960–2000. *Psychological Medicine*. 2005;35(6):873-880. doi:10.1017/S0033291704003344
24. Hill GB, Harvey W. The mortality of dentists. *British Dental Journal*. 1972;132(5):179-182.
25. Juel K, Mosbech J, Hansen ES. [Mortality and cause of death among Danish physicians 1973-1992]. *Ugeskrift for Laeger*. 1997;159(44):6512-6518.
26. Kavaliauskas P, Jasilionis D, Kazlauskas E, Smailyte G. Differences in all-cause and suicide mortality between health care and other employees in Lithuania: a census-linked mortality follow-up study, 2011-2019 | Research Square. *Social Psychiatry & Psychiatric Epidemiology*. Published online 2023. doi:10.21203/rs.3.rs-2658186/v1
27. Kelly S, Bunting J. Trends in suicide in England and Wales, 1982-96. *Popul Trends*. 1998;(92):29-41.
28. Kelly S, Charlton J, Jenkins R. Suicide deaths in England and Wales, 1982-92: the contribution of occupation and geography. *Popul Trends*. 1995;(80):16-25.
29. Kobo O, Abramov D, Volgman AS, et al. Causes of Death Among Health Care Professionals in the United States. *Population Health Management*. Published online August 29, 2023. doi:10.1089/pop.2023.0070
30. Kölves K, De Leo D. Suicide in Medical Doctors and Nurses: An Analysis of the Queensland Suicide Register. *The Journal of Nervous and Mental Disease*. 2013;201(11):987-990. doi:10.1097/NMD.0000000000000047
31. Lee PN. Has the mortality of male doctors improved with the reductions in their cigarette smoking? *British Medical Journal*. 1979;2(6204):1538-1540.
32. Lee WJ, Cha ES, Bang YJ, Hsu CY, Chang SS. Suicide deaths among diagnostic medical radiation workers in South Korea, 1996–2017. *Occup Environ Med*. 2020;77(10):675. doi:10.1136/oemed-2020-106446
33. Linde HW, Mesnick PS, Smith NJ. Causes of death among anesthesiologists: 1930-1946. *Anesthesia & Analgesia*. 1981;60(1):1-7.
34. Lollis SS, Valdes PA, Li Z, Ball PA, Roberts DW. Cause-specific mortality among neurosurgeons: Clinical article. *Journal of Neurosurgery*. 2010;113(3):474-478. doi:10.3171/2010.1.JNS091740
35. Milner AJ, Maheen H, Bismark MM, Spittal MJ. Suicide by health professionals: a retrospective mortality study in Australia, 2001-2012. *Medical Journal of Australia*. 2016;205(6):260-265.
36. Naumovska K. *Suizid von Ärztinnen/Ärzten und von Gesundheits- und Krankenpflegerinnen/Gesundheits- und Krankenpflegern in Hamburg von Januar 2007 bis Juni 2014*. doctoralThesis. Staats- und Universitätsbibliothek Hamburg Carl von Ossietzky; 2015. Accessed September 17, 2023. <https://ediss.sub.uni-hamburg.de/handle/ediss/6816>
37. Neil HA, Fairer JG, Coleman MP, Thurston A, Vessey MP. Mortality among male anaesthetists in the United Kingdom, 1957-83. *British Medical Journal Clinical Research Ed*. 1987;295(6594):360-362.

38. Nordentoft M. [Suicide among physicians]. *Ugeskrift for Læger*. 1988;150(41):2440-2443.
39. Andersen O. *Dødelighed Og Erhverv 1970-1980*. Danmarks Statistik; 1985.
40. Olfson M, Cosgrove CM, Wall MM, Blanco C. Suicide Risks of Health Care Workers in the US. *JAMA*. 2023;330(12):1161-1166. doi:10.1001/jama.2023.15787
41. Duarte D, El-Hagrassy MM, Couto TC, Gurgel W, Fregni F, Correa H. Male and Female Physician Suicidality: A Systematic Review and Meta-analysis. *JAMA Psychiatry*. 2020;77(6):587-597. doi:10.1001/jamapsychiatry.2020.0011
42. Office for National Statistics. Occupational mortality in England and Wales. Published March 11, 2013. Accessed September 17, 2023. <https://www.data.gov.uk/dataset/bb414a35-9beb-4931-8908-56c88af7851c/occupational-mortality-in-england-and-wales>
43. Office of Population Censuses and Surveys. *Occupational Mortality. The Registrar General's Decennial Supplement for England and Wales (1970-1972)*. Her Majesty's Stationery Office; 1978.
44. Roberts SE, Jaremin B, Lloyd K. High-risk occupations for suicide. *Psychological Medicine*. 2013;43(06):1231-1240. doi:10.1017/S0033291712002024
45. Rose KD, Rosow I. Physicians who kill themselves. *Archives of General Psychiatry*. 1973;29(6):800-805.
46. Samkoff JS, Hockenberry S, Simon LJ, Jones RL. Mortality of young physicians in the United States, 1980-1988. *Academic Medicine*. 1995;70(3):242-244.
47. Shang TF, Chen PC, Wang JD. Mortality of doctors in Taiwan. *Occupational Medicine (Oxford)*. 2011;61(1):29-32.
48. Shang TF, Chen PC, Wang JD. Mortality among dentists in Taiwan, 1985-2009. *Journal of the Formosan Medical Association*. 2012;111(10):567-571.
49. Shepherd A, Mckenney M, Elkbuli A. Healing Our Healers: The Silent Tragedy of Physician Suicide. *The American Surgeon<sup>TM</sup>*. 2020;86(4):213-215. doi:10.1177/000313482008600418
50. Shimpo H, Yokoyama E, Tsurumaki K. Causes of death and life expectancies among dentists. *International Dental Journal*. 1998;48(6):563-570.
51. Simpson R, Beck J, Jakobsen J, Simpson J. Suicide statistics of dentists in Iowa, 1968 to 1980. *Journal of the American Dental Association*. 1983;107(3):441-443.
52. Sonneck G, Wagner R. Suicide and Burnout of Physicians: *OMEGA - Journal of Death and Dying*. Published online January 1, 1996. doi:10.2190/OYVL-APPT-NL35-1LXJ
53. Sood MM, Rhodes E, Talarico R, et al. Suicide and Self-Harm Among Physicians in Ontario, Canada. *Can J Psychiatry*. 2022;67(10):778-786. doi:10.1177/07067437221099774
54. Steppacher RC, Mausner JS. Suicide in male and female physicians. *JAMA*. 1974;228(3):323-328.
55. Torre DM, Wang NY, Meoni LA, Young JH, Klag MJ, Ford DE. Suicide compared to other causes of mortality in physicians. *Suicide & Life-Threatening Behavior*. 2005;35(2):146-153.
56. Ullmann D, Phillips RL, Beeson WL, et al. Cause-specific mortality among physicians with differing life-styles. *JAMA*. 1991;265(18):2352-2359.
57. Windsor-Shellard B, Gunnell D. Occupation-specific suicide risk in England: 2011–2015. *Br J Psychiatry*. 2019;215(4):594-599. doi:10.1192/bjp.2019.69
58. Yagmour NA, Brigham TP, Richter T, et al. Causes of Death of Residents in ACGME-Accredited Programs 2000 Through 2014: Implications for the Learning Environment. *Academic Medicine*. 2017;92(7):976-983. doi:10.1097/ACM.0000000000001736

59. Yatsu M. [Life expectancy of the Japanese and causes of death among dentists]. *Shikai Tenbo - Dental Outlook*. 1979;53(1):141-153.
60. Zaid M, Diab M. Surgeon Suicide Remains a Critical Issue for the Orthopaedic Profession. *JBJS*. 2021;103(20):e81. doi:10.2106/JBJS.20.01125
61. Munn Z, Moola S, Lisy K, Riitano D, Tufanaru C. Chapter 5: Systematic reviews of prevalence and incidence. In: *JBI Manual for Evidence Synthesis*. ; 2020. Accessed July 19, 2023. <https://jbi.global/critical-appraisal-tools>
62. Lindhardt M, Frandsen E, Hamtoft H, Mosbech J. Causes of death among the medical profession in Denmark. *Dan Med Bull*. 1963;(10):59-64.
63. Craig AG, Pitts FN Jr. Suicide by physicians. *Diseases of the Nervous System*. 1968;29(11):763-772.
64. Dean G. The causes of death of south african doctors and dentists. *S Afr Med J*. Published online 1969.
65. Rich CL, Pitts FN Jr. Suicide by male physicians during a five-year period. *American Journal of Psychiatry*. 1979;136(8):1089-1090.
66. Balogh J. Mortality of medical men in the Hungary (1960-1964). *Sante Publique*. 1981;24(1):41-60.
67. Enstrom JE. Trends in mortality among California physicians after giving up smoking: 1950-79. *British Medical Journal Clinical Research Ed*. 1983;286(6371):1101-1105.
68. Revicki DA, May HJ. Physician suicide in North Carolina. *Southern Medical Journal*. 1985;78(10):1205-1207.
69. Bamayr A, Feuerlein W. Incidence of suicides among medical doctors and dentists in Upper Bavaria. *Social Psychiatry*. 1986;21(1):39-48.
70. Office of Population Censuses and Surveys. *Occupational Mortality 1979-80, 1982-83, Decennial Supplement, Part I+II*. Her Majesty's Stationery Office; 1986.
71. Richings J, Khara G, McDowell M. Suicide in young doctors. *The British Journal of Psychiatry*. 1986;149:475-478.
72. Arnetz BB, Horte LG, Hedberg A, Theorell T, Allander E, Malaker H. Suicide patterns among physicians related to other academics as well as to the general population. Results from a national long-term prospective study and a retrospective study. *Acta Psychiatrica Scandinavica*. 1987;75(2):139-143.
73. Rimpela AH, Nurminen MM, Pulkkinen PO, Rimpela MK, Valkonen T. Mortality of doctors: do doctors benefit from their medical knowledge? *Lancet*. 1987;1(8524):84-86.
74. Kono S, Ikeda M, Tokudome S, Nishizumi M, Kuratsune M. Cause-specific mortality among male Japanese physicians: a cohort study. *Asian Medical Journal*. 1988;31(8):453-461.
75. Schlicht SM, Gordon IR, Richard J, Ball B, Christie DGS. Suicide and related deaths in Victorian doctors. *Medical Journal of Australia*. 1990;153(9):518-521.
76. Stefansson CG, Wicks S. Health care occupations and suicide in Sweden 1961-1985. *Social Psychiatry & Psychiatric Epidemiology*. 1991;26(6):259-264.
77. Shima M, Nitta Y, Iwasaki A, Adachi M, Yoshii I. [A study of mortality among male physicians in Chiba prefecture]. *Nippon Koshu Eisei Zasshi - Japanese Journal of Public Health*. 1992;39(3):139-146.
78. Herner B. [High frequency of suicide among younger physicians. Unsatisfactory working situations should be dealt with]. *Lakartidningen*. 1993;90(40):3449-3452.



79. Lindeman S, Laara E, Hirvonen J, Lonnqvist J. Suicide mortality among medical doctors in Finland: are females more prone to suicide than their male colleagues? *Psychological Medicine*. 1997;27(5):1219-1222.
80. Rafnsson V, Gunnarsdottir HK. [Mortality and cancer incidence among physicians and lawyers.]. *Laeknabladid*. 1998;84(2):107-115.
81. Juel K, Mosbech J, Hansen ES. Mortality and causes of death among Danish medical doctors 1973-1992. *International Journal of Epidemiology*. 1999;28(3):456-460. doi:10.1093/ije/28.3.456
82. Hawton K, Clements A, Sakarovitch C, Simkin S, Deeks JJ. Suicide in doctors: a study of risk according to gender, seniority and specialty in medical practitioners in England and Wales, 1979-1995. *Journal of Epidemiology & Community Health*. 2001;55(5):296-300. doi:10.1136/jech.55.5.296
83. Hostettler M, Minder C. [Mortality of Swiss dentists]. *Schweizer Monatsschrift fur Zahnmedizin*. 2002;112(5):456-462.
84. Innos K, Rahu K, Baburin A, Rahu M. Cancer incidence and cause-specific mortality in male and female physicians: a cohort study in Estonia. *Scandinavian Journal of Public Health*. 2002;30(2):133-140.
85. Shin YC, Kang JH, Kim CH. [Mortality among medical doctors based on the registered cause of death in Korea 1992-2002]. *Journal of Preventive Medicine & Public Health / Yebang Uihakhoe Chi*. 2005;38(1):38-44.
86. Meltzer H, Griffiths C, Brock A, Rooney C, Jenkins R. Patterns of suicide by occupation in England and Wales: 2001–2005. *British Journal of Psychiatry*. 2008;193(01):73-76. doi:10.1192/bjp.bp.107.040550
87. Petersen MR, Burnett CA. The suicide mortality of working physicians and dentists. *Occupational Medicine (Oxford)*. 2008;58(1):25-29.
88. Skegg K, Firth H, Gray A, Cox B. Suicide by occupation: does access to means increase the risk? *Australian & New Zealand Journal of Psychiatry*. 2010;44(5):429-434.
89. Aasland OG, Hem E, Haldorsen T, Ekeberg Ø. Mortality among Norwegian doctors 1960-2000. *BMC Public Health*. 2011;11(1). doi:10.1186/1471-2458-11-173
90. Palhares-Alves HN, Palhares DM, Laranjeira R, Nogueira-Martins LA, Sanchez ZM. Suicide among physicians in the state of São Paulo, Brazil, across one decade. *Revista Brasileira de Psiquiatria*. 2015;37(2):146-149. doi:10.1590/1516-4446-2014-1534
91. Claessens H. Suïcide bij Vlaamse artsen. *Huisarts Nu*. 2016;45(6):228-231. doi:10.1007/s40954-016-0081-5
92. Davis MA, Cher BAY, Friese CR, Bynum JPW. Association of US Nurse and Physician Occupation With Risk of Suicide. *JAMA Psychiatry*. 2021;78(6):651. doi:10.1001/jamapsychiatry.2021.0154
93. Gold KJ, Schwenk TL, Sen A. Physician Suicide in the United States: Updated Estimates from the National Violent Death Reporting System. *Psychology, Health & Medicine*. 2021;27(7):1563-1575. doi:10.1080/13548506.2021.1903053
94. Ye GY, Davidson JE, Kim K, Zisook S. Physician death by suicide in the United States: 2012–2016. *Journal of Psychiatric Research*. 2021;134:158-165. doi:10.1016/j.jpsychires.2020.12.064
95. Herrero-Huertas L, Andérica E, Belza MJ, Ronda E, Barrio G, Regidor E. Avoidable mortality for causes amenable to medical care and suicide in physicians in Spain. *Int Arch Occup Environ Health*. 2022;95(5):1147-1155. doi:10.1007/s00420-021-01813-9

96. FSO (Federal Statistics Office) Switzerland. Data request for physician suicide data. <https://www.bfs.admin.ch/bfs/en/home.html>
97. FMH (Foederatio Medicorum Helveticorum). Online-tool for the physician statistics of the Swiss Medical Association (FMH), data for 2008-2020. <https://aerztstatistik.fmh.ch/>
98. ONS (Office for National Statistics) UK. Suicide by Occupation in England: 2011 to 2015 and 2016 to 2020. Published 2021. <https://www.ons.gov.uk/peoplepopulationandcommunity/birthsdeathsandmarriages/deaths/adhocs/13768suicidebyhealthcarerelatedoccupationsengland2011to2015and2016to2020registrations>
99. Petrie K, Zeritis S, Phillips M, et al. Suicide among health professionals in Australia: A retrospective mortality study of trends over the last two decades. *Aust N Z J Psychiatry*. 2023;57(7):983-993. doi:10.1177/00048674221144263
100. Zimmermann C, Strohmaier S, Niederkrotenthaler T, Thau K, Schernhammer E. Suicide mortality among physicians, dentists, veterinarians, and pharmacists as well as other high-skilled occupations in Austria from 1986 through 2020. *Psychiatry Research*. 2023;323:115170. doi:10.1016/j.psychres.2023.115170
101. Pitts FN Jr, Schuller AB, Rich CL, Pitts AF. Suicide among U.S. women physicians, 1967-1972. *American Journal of Psychiatry*. 1979;136(5):694-696.
102. Rothman K, Boyce J. *Epidemiologic Analysis with a Programmable Calculator*. Vol NIH Publication No. 79-1649. National Institutes of Health; 1979. Accessed September 12, 2023. [https://hero.epa.gov/hero/index.cfm/reference/details/reference\\_id/3978444](https://hero.epa.gov/hero/index.cfm/reference/details/reference_id/3978444)
103. Cochrane. Cochrane Handbook for Systematic Reviews of Interventions. Version 6.3. Published 2022. Accessed July 19, 2023. <https://training.cochrane.org/handbook/current>
